# Supplementary material for: Metabolite Profiling and Transcriptome Analysis Provide Insight into Seed Coat Color in Brassica juncea
Source: MDPI journal article supplement (doi:10.3390/ijms22137215), 2021-07-05
Supplement: s1 [file s1]

## \*

100

extron2\*

200

300

400

500

600

700

800

extron3

```

BrTT8A-b_g : AACAAATCAAAATATATATGTGGAAGTATTAATTTGTAGGATGCCAGGAAAAGCGTATGCGAGGAGGAAGCACATATGGCTAAGTGGTGCAAAATGAG : 949
BrTT8A-y_g : AACAAATCAAAATATATATGTGGAAGTATTAATTTGTAGGATGCCAGGAAAAGCGTATGCGAGGAGGAAGCACATATGGCTAAGTGGTGCAAAATGAG : 949
BnTT8A-b_g : AACAAATCAAAATATATATGTGGAAGTATTAATTTGTAGGATGCCAGGAAAAGCGTATGCGAGGAGGAAGCACATATGGCTAAGTGGTGCAAAATGAG : 949
BnTT8A-y_g : AACAAATCAAAATATATATGTGGAAGTATTAATTTGTAGGATGCCAGGAAAAGCGTATGCGAGGAGGAAGCACATATGGCTAAGTGGTGCAAAATGAG : 949
BjTT8A-d_g : AACAAATCAAAATATATATGTGGAAGTATTAATTTGTAGGATGCCAGGAAAAGCGTATGCGAGGAGGAAGCACATATGGCTAAGTGGTGCAAAATGAG : 949
BjTT8A-y_g : AACAAATCAAAATATATATGTGGAAGTATTAATTTGTAGGATGCCAGGAAAAGCGTATGCGAGGAGGAAGCACATATGGCTAAGTGGTGCAAAATGAG : 949
BjTT8A-y r : AAC-----AATGTGGAAGTATTAATTTGTAGGATGCCAGGAAAAGCGTATGCGAGGAGGAAGCACATATGGCTAAGTGGTGCAAAATGAG : 949
AACAAatcaaaatatATATGTGGAAGTATTAATTTGTAGGATGCCAGGAAAAGCGTATGCGAGGAGGAAGCACATATGGCTAAGTGGTGCAAAATGAG

```

|              |                                                         |      |                                            |        |
|--------------|---------------------------------------------------------|------|--------------------------------------------|--------|
|              |                                                         | 1000 |                                            | *      |
| BrTT8A-b_g : | GTTGACAATAAAATCTTCTCTAGGGCTATTTCTGCAAAGGTTTCACATCTTCTTA |      | CATTCAACCACTACACTGTGCATCTACTTCTACTTATTTAGA | : 1043 |
| BrTT8A-y_g : | GTTGACAATAAAATCTTCTCTAGGGCTATTTCTGCAAAGGTTTCACATCTTCTTA |      | CATTCAACCACTACACTGTGCATCTACTTCTACTTATTTAGA | : 1045 |
| BnTT8A-b_g : | GTTGACAATAAAATCTTCTCTAGGGCTATTTCTGCAAAGGTTTCACATCTTCTTA |      | CATTCAACCACTACACTGTGCATCTACTTCTACTTATTTAGA | : 1043 |
| BnTT8A-y_g : | GTTGACAATAAAATCTTCTCTAGGGCTATTTCTGCAAAGGTTTCACATCTTCTTA |      | CATTCAACCACTACACTGTGCATCTACTTCTACTTATTTAGA | : 1043 |
| BjTT8A-d_g : | GTTGACAATAAAATCTTCTCTAGGGCTATTTCTGCAAAGGTTTCACATCTTCTTA |      | CATTCAACCACTACACTGTGCATCTACTTCTACTTATTTAGA | : 1043 |
| BjTT8A-y_g : | GTTGACAATAAAATCTTCTCTAGGGCTATTTCTGCAAAGGTTTCACATCTTCTTA |      | CATTCAACCACTACACTGTGCATCTACTTCTACTTATTTAGA | : 1043 |
| BjTT8A-y_r : | GTTGACAATAAAATCTTCTCTAGGGCTATTTCTGCAAAGGTTTCACATCTTCTTA |      | CATTCAACCACTACACTGTGCATCTACTTCTACTTATTTAGA | : 1043 |
|              | GTTGACAATAAAATCTTCTCTAGGGCTATTTCTGCAAAGGTTTCACATCTTCTTA |      | CATTCAACCACTACACTGTGCATCTACTTCTACTTATTTAGA |        |

1100
exon4 \*

```

BrTT8A-b_g : TTTATGCAATTTTATATATCTCATTCTGCAAACAACTAATTAATTTTATCTTCTCTTTACTTGAATGCTCTCTTTCCACATTAGAGTGCCAAAATTCA : 1137
BrTT8A-y_g : TTTATGCAATTTTATATATCTCATTCTGCAAACAACTAATTAATTTTATCTTCTCTTTACTTGAATGCTCTCTTTCCACATTAGAGTGCCAAAATTCA : 1141
BrTT8A-b_g : TTTATGCAATTTTATATATCTCATTCTGCAAACAACTAATTAATTTTATCTTCTCTTTACTTGAATGCTCTCTTTCCACATTAGAGTGCCAAAATTCA : 1137
BnTT8A-y_g : TTTATGCAATTTTATATATCTCATTCTGCAAACAACTAATTAATTTTATCTTCTCTTTACTTGAATGCTCTCTTTCCACATTAGAGTGCCAAAATTCA : 1137
BjTT8A-d_g : TTTATGCAATTTTATATATCTCATTCTGCAAACAACTAATTAATTTTATCTTCTCTTTACTTGAATGCTCTCTTTCCACATTAGAGTGCCAAAATTCA : 1139
BjTT8A-y_g : TTTATGCAATTTTATATATCTCATTCTGCAAACAACTAATTAATTTTATCTTCTCTTTACTTGAATGCTCTCTTTCCACATTAGAGTGCCAAAATTCA : 1139
BjTT8A-y_r : TTTATGCAATTTTATATATCTCATTCTGCAAACAACTAATTAATTTTATCTTCTCTTTACTTGAATGCTCTCTTTCCACATTAGAGTGCCAAAATTCA : 1139
              TTTATGCAATTTTATATATCTCATTCTGCAAACAACTAATTAATTTTATCTTCTCTTTACTTGAATGCTCTCTTTCCACATTAGAGTGCCAAAATTCA

```

1200

```

BrTT8A-b_g : GGTAAATTTTGCTTTATTAATTAATTATTTAATTTTCGTAGAAATGAAAGGTATCAATTAAATAAAGTTATTTACATATTTGACAATGTGTTTGTG : 1233
BrTT8A-y_g : GGTAAATTTTGCTTTATTAATTAATTAATTATTTAATTTTCGTAGAAATGAAAGGTATCAATTAAATAAAGTTATTTACATATTTGACAATGTGTTTGTG : 1237
BnTT8A-b_g : GGTAAATTTTGCTTTATTAATTAATTAATTATTTAATTTTCGTAGAAATGAAAGGTATCAATTAAATAAAGTTATTTACATATTTGACAATGTGTTTGTG : 1233
BrTT8A-y_g : GGTAAATTTTGCTTTATTAATTAATTAATTATTTAATTTTCGTAGAAATGAAAGGTATCAATTAAATAAAGTTATTTACATATTTGACAATGTGTTTGTG : 1233
BjTT8A-d_g : GGTAAATTTTGCTTTATTAATTAATTAATTATTTAATTTTCGTAGAAATGAAAGGTATCAATTAAATAAAGTTATTTACATATTTGACAATGTGTTTGTG : 1235
BjTT8A-y_g : GGTAAATTTTGCTTTATTAATTAATTAATTATTTAATTTTCGTAGAAATGAAAGGTATCAATTAAATAAAGTTATTTACATATTTGACAATGTGTTTGTG : 1235
BjTT8A-y_r : GGTAAATTTTGCTTTATTAATTAATTAATTATTTAATTTTCGTAGAAATGAAAGGTATCAATTAAATAAAGTTATTTACATATTTGACAATGTGTTTGTG : 1235

```

BrTT8A-b g : ATGAAAAAA\* AATAAT-----AATCAGACAGTGGTTTGCATTCCCGTGCTTGATGGCGTTTGGAACTAGGCACAACGAACAAGGTGAAAATCT : 1322  
 BrTT8A-y g : ATGAAAAAAATATAATGAAAAAATCAGACAGTGGTTTGCATTCCCGTGCTTGATGGCGTTTGGAACTAGGCACAACGAACAAGGTAAAAATCT : 1333  
 BnTT8A-b g : ATGAAAAAA--ATAAT-----AATCAGACAGTGGTTTGCATTCCCGTGCTTGATGGCGTTTGGAACTAGGCACAACGAACAAGGTAAAAATCT : 1321  
 BnTT8A-y g : ATGAAAAAA--ATAAT-----AATCAGACAGTGGTTTGCATTCCCGTGCTTGATGGCGTTTGGAACTAGGCACAACGAACAAGGTAAAAATCT : 1321  
 BjTT8A-d g : ATGAAAAAAATATAAT-----AATCAGACAGTGGTTTGCATTCCCGTGCTTGATGGCGTTTGGAACTAGGCACAACGAACAAGGTAAAAATCT : 1325  
 BjTT8A-y g : ATGAAAAAAATATAAT-----AATCAGACAGTGGTTTGCATTCCCGTGCTTGATGGCGTTTGGAACTAGGCACAACGAACAAGGTAAAAATCT : 1325  
 BjTT8A-y\_r : ATGAAAAAAATATAAT-----AATCAGACAGTGGTTTGCATTCCCGTGCTTGATGGCGTTTGGAACTAGGCACAACGAACAAGGTAAAAATCT : 1325  
 ATGAAAAAA AATAAT AATCAGACAGTGGTTTGCATTCCCGTGCTTGATGGCGTTTGGAACTAGGCACAACGAACAAGGTAAAAATCT

\*1400

|              |                          |                                     |           |                           |        |
|--------------|--------------------------|-------------------------------------|-----------|---------------------------|--------|
| BrTT8A-b_g : | CTATTTCTGTCGGTACCCAAAATG | TAGTCGAATATATTCAGCTCATCTATATGTTACTT | GAGTATCTC | AAAAAGACTATATATGGTAAAGTTT | : 1418 |
| BrTT8A-y_g : | CTATTTCTGTCGGTACCCAAAATG | TAGTCGAATATATTCAGCTCATCTATATGTTACTT | GAGTATCTC | AAAAAGACTATATATGGTAAAGTTT | : 1429 |
| BnTT8A-b_g : | CTATTTCTGTCGGTACCCAAAATG | TAGTCGAATATATTCAGCTCATCTATATGTTACTT | GAGTATCTC | AAAAAGACTATATATGGTAAAGTTT | : 1417 |
| BrTT8A-y_g : | CTATTTCTGTCGGTACCCAAAATG | TAGTCGAATATATTCAGCTCATCTATATGTTACTT | GAGTATCTC | AAAAAGACTATATATGGTAAAGTTT | : 1417 |
| BjTT8A-d_g : | CTATTTCTGTCGGTACCCAAAATG | TAGTCGAATATATTCAGCTCATCTATATGTTACTT | GAGTATCTC | AAAAAGACTATATATGGTAAAGTTT | : 1421 |
| BjTT8A-y_g : | CTATTTCTGTCGGTACCCAAAATG | TAGTCGAATATATTCAGCTCATCTATATGTTACTT | GAGTATCTC | AAAAAGACTATATATGGTAAAGTTT | : 1421 |
| BjTT8A-y_r : | CTATTTCTGTCGGTACCCAAAATG | TAGTCGAATATATTCAGCTCATCTATATGTTACTT | GAGTATCTC | AAAAAGACTATATATGGTAAAGTTT | : 1421 |
|              | CTATTTCTGTCGGTACCCAAAAT  | TAGTCGAATATATTCAGCTCATCTATATGTTACTT | GagTATCTC | AAAAAGACTATATATGGTAAAGTTT |        |

BrTT8A-b\_g : C C A A A A T T C T A T A T T C G A A G T T T C A A G G T A T T T T T T T T C C A A A A C A A A A T T C A A A T T T A A C T T A A A A T T A T T T G T A A T T T A C A A T A T G A T C C T : 1514  
 BrTT8A-y\_g : C C A A A A T T C T A T A T T C G A A G T T T C A A G T G - C T T T T C C A A A A C A A A A T T T A A A T T A A C T T A A A A T T A T T T G T A A T T T A C A G A T A T G A T C C T : 1524  
 BnTT8A-b\_g : T C A A A A T T C T A T A T T C G A A G T T T C A A G G T A T T T T T T T T C A A A A C A A A A T T C A A A T T T A A C T T C A A A T T A T T T G T A A T T T A C A A T A T G A T C C T : 1513  
 BrTT8A-y\_g : T C A A A A T T C T A T A T T C G A A G T T T C A A G G T A T T T T T T T T C A A A A C A A A A T T C A A A T T T A A C T T A A A A T T A T T T G T A A T T T A C A A T A T G A T C C T : 1513  
 BjTT8A-d\_g : C C A A A A T T C T A T A T T C G A A G T T T A A G G T A T T T T T T T T C A A A A C A A A A T T C A A A T T T A A C T T A A A A T T A T T T G T A A T T T A C A A T A T G A T C C T : 1517  
 BjTT8A-y\_g : C C A A A A T T C T A T A T T C G A A G T T T A A G G T A T T T T T T T T C A A A A C A A A A T T C A A A T T T A A C T T A A A A T T A T T T G T A A T T T A C A A T A T G A T C C T : 1517  
 BjTT8A-y\_r : C C A A A A T T C T A T A T T C G A A G T T T A A G G T A T T T T T T T T C A A A A C A A A A T T C A A A T T T A A C T T A A A A T T A T T T G T A A T T T A C A A T A T G A T C C T : 1517  
 C A A A A T T C T A T A T T C G A A G T T T A A G G A t t T T T T t T t C A A A A C A A A A T T C A A A T T T A A C T T A A A A T T A T T T G T A A T T T A C A A T A T G A T C C T

```

*
1600
BrTT8A-b_g : TATACTTATCATAATTAAATATAAAATACATAAAACCTTTTATAAAATACTAGCACATATAAAAAATATTACAATAATATTAATTAATAAATTCCTTACA : 1610
BrTT8A-y_g : TATACTTATCATAAATTAATATAAAATACATAAAACCTTTTATAAAATACTAGCACATATAAAAAATATTATATAATATTAATTAATAAATTCCTTACA : 1620
BnTT8A-b_g : TATACTTATCATAAATTAATATAAAATACATAAAACCTTTTATAAAATACTAGCACATATAAAAAATATTACAATAATATTAATTAATAAATTCCTTACA : 1609
BrTT8A-y_g : TATACTTATCATAAATTAATATAAAATACATAAAACCTTTTATAAAATACTAGCACATATAAAAAATATTACAATAATATTAATTAATAAATTCCTTACA : 1609
BjTT8A-d_g : TATACTTATCATAAATTAATATAAAATACATAAAACCTTTTATAAAATACTAGCACATATAAAAAATATTACAATAATATTAATTAATAAATTCCTTACA : 1613
BjTT8A-y_g : TATACTTATCATAAATTAATATAAAATACATAAAACCTTTTATAAAATACTAGCACATATAAAAAATATTACAATAATATTAATTAATAAATTCCTTACA : 1613
BjTT8A-y_r : TATACTTATCATAAATTAATATAAAATACATAAAACCTTTTATAAAATACTAGCACATATAAAAAATATTACAATAATATTAATTAATAAATTCCTTACA : 1613
TATACTTATCATAAATTAATATAAAATACATAAAACCTTTTATAAAATACTAGCACATATAAAAAATATTACAATAATATTAATTAATAAATTCCTTACA

```

BrTT8A-b\_g : CTAAATATATAAAATTATTAACAAAAATACATAATTAAATATT : 1705  
 BrTT8A-y\_g : CTAAATATATAAAATTATTAACAAAAATACATAATTAAATATT : 1716  
 BnTT8A-b\_g : CTAAATATATAAAATTATTAACAAAAATACATAATTAAATATT : 1704  
 BrTT8A-y\_g : CTAAATATATAAAATTATTAACAAAAATACATAATTAAATATT : 1704  
 BjTT8A-d\_g : CTAAATATATAAAATTATTAACAAAAATACATAATTAAATATT : 1708  
 BjTT8A-y\_g : CTAAATATATAAAATTATTAACAAAAATACATAATTAAATATT : 1708  
 BjTT8A-y\_r : CTAAATATATAAAATTATTAACAAAAATACATAATTAAATATT : 1708

\* 1800

```

BrTT8A-b_g : TCTTCGGTTACACAAAATTTGTTTGAAAATATTCTCGAGCTTCTGGAGAAATTTACTAGACTATTAGTGTTATTGTAATATTTAAATTTGTGCA : 1801
BrTT8A-y_g : TCTTCGGTTACACAAAATTTGTTTGAAAATATTCTCGAGCTTCTGGAGAAATTTACTAGACTATTAGTGTTATTGTAATATTTAAATTTGTGCA : 1812
BnTT8A-b_g : TCTTCGGTTACACAAAATTTGTTTGAAAATATTCTCGAGCTTCTGGAGAAATTTACTAGACTATTAGTGTTATTGTAATATTTAAATTTGTGCA : 1800
BnTT8A-y_g : TCTTCGGTTACACAAAATTTGTTTGAAAATATTCTCGAGCTTCTGGAGAAATTTACTAGACTATTAGTGTTATTGTAATATTTAAATTTGTGCA : 1800
BjTT8A-d_g : TTTTCGGTTACACAAAATTTGTTTGAAAATATTCTCGAGCTTCTGGAGAAATTTACTAGACTATTAGTGTTATTGTAATATTTAAATTTGTGCA : 1804
BjTT8A-y_g : TTTTCGGTTACACAAAATTTGTTTGAAAATATTCTCGAGCTTCTGGAGAAATTTACTAGACTATTAGTGTTATTGTAATATTTAAATTTGTGCA : 1804
BjTT8A-y_r : TTTTCGGTTACACAAAATTTGTTTGAAAATATTCTCGAGCTTCTGGAGAAATTTACTAGACTATTAGTGTTATTGTAATATTTAAATTTGTGCA : 1804
T TTCGGTTACACAAAATTTGTTTGgAAAATATT T GAGCTTCTGGAG AAATTTACTAGACTATTAGTGTTATTGTAATATTTAAATTT TGCA

```

\* 1900

```

BrTT8A-b_g : ATAAATATGCTCTCATGTATTTTTTAAAAATGTTT-TTTATTAAG--TTTTTTTGAATA-TCTTTTGTGTAATTTTAGTTATAAAAAATATTAT : 1893
BrTT8A-y_g : ATAACTATGCTCTCATGTATTTTTTAAAAATGTTTATTTATTGAGTT-TTTTTTTGTAATA-TCTTTTGTGTAATTTTAGTTATAAAAAATATTAT : 1907
BnTT8A-b_g : ATAAATATGCTCTCATGTATTTTTTAAAAATGTTTCTGTAATTTTGAATTTAAAAAGTAATTTTGAATATTTATGATATAAAAAATGTTTAAAGAT : 1893
BnTT8A-y_g : ATAAATATGCTCTCATGTATTTTTTAAAAATGTTT-TTTATTAAG--TTTTTTTGAATA-TCTTTTGTGTAATTTTAGTTATAAAAAATATTAT : 1893
BjTT8A-d_g : ATAAATATGCTCTCATGTATTTTTTAAAAATGTTT-TTTATTAAG--TTTTTTTGAATA-TCTTTTGTGTAATTTTAGTTATAAAAAATATTAT : 1896
BjTT8A-y_g : ATAAATATGCTCTCATGTATTTTTTAAAAATGTTT-TTTATTAAG--TTTTTTTGAATA-TCTTTTGTGTAATTTTAGTTATAAAAAATATTAT : 1896
BjTT8A-y_r : ATAAATATGCTCTCATGTATTTTTTAAAAATGTTT-TTTATTAAG--TTTTTTTGAATA-TCTTTTGTGTAATTTTAGTTATAAAAAATATTAT : 1896
ATAAtATGCTCTCATGTATTTTTT AAAAATGTTT TTTATTAAG tTTTTTTTGAATAtTCTTtTGTGTAATTTTAGTTATAAAAAATATTAT

```

\* 2000

```

BrTT8A-b_g : AAATCTTAACCTAAAAATTTTCTTTAATTTTATGCGTAAATTTTGAATTTAAAAAGTAATTTTGAATATTTTATGATATAAAAAATGTTTAAAGAT : 1989
BrTT8A-y_g : AAATCTTAACCTAAAAATTTTCTTTAATTTTATGCTGTAATTTTGAATTTAAAAAGTAATTTTGAATATTTTATGATATAAAAAATGTTTAAAGAT : 2003
BnTT8A-b_g : AAATCTTAACCTAAAAATTTTCTTTAATTTTATGCGTAAATTTTGAATTTAAAAAGTAATTTTGAATATTTTATGATATAAAAAATGTTTAAAGAT : 1989
BnTT8A-y_g : AAATCTTAACCTAAAAATTTTCTTTAATTTTATGCGTAAATTTTGAATTTAAAAAGTAATTTTGAATATTTTATGATATAAAAAATGTTTAAAGAT : 1989
BjTT8A-d_g : AAATCTTAACCTAAAAATTTTCTTTAATTTTATGCGTAAATTTTGAATTTAAAAAGTAATTTTGAATATTTTATGATATAAAAAATGTTTAAAGAT : 1992
BjTT8A-y_g : AAATCTTAACCTAAAAATTTTCTTTAATTTTATGCGTAAATTTTGAATTTAAAAAGTAATTTTGAATATTTTATGATATAAAAAATGTTTAAAGAT : 1992
BjTT8A-y_r : AAATCTTAACCTAAAAATTTTCTTTAATTTTATGCGTAAATTTTGAATTTAAAAAGTAATTTTGAATATTTTATGATATAAAAAATGTTTAAAGAT : 1992
AAATCTTAACCTAAAA TTTT TTTAATTTTATGCGTAAATTTTGAATTTAAAAAGTAATTTTGAATATTTTATGATATAAAAAATGTTTAAAGAT

```

\* 2100

```

BrTT8A-b_g : TAATAAGATAAATGACAAAAATTTAAAAATcATTAATATAATGTGTAATTAATTAAGACACCAAAATACAAATAAAAAGAAAAATTCtAAATT : 2085
BrTT8A-y_g : TAATAAGATAAATGACAAAAATTTAAAAATcATTAATATAATGTGTAATTAATTAAGACACCAAAATACAAATAAAAAGAAAAATTCcAAATT : 2097
BnTT8A-b_g : TAATAAGATAAATGACAAAAATTTAAAAATcATTAATATAATGTGTAATTAATTAAGAGCACCACCAAAATACAAATAAAAAGAAcAAATTCtAAATT : 2085
BnTT8A-y_g : TAATAAGATAAATGACAAAAATTTAAAAATcATTAATATAATGTGTAATTAATTAAGAGCACCACCAAAATACAAATAAAAAGAAcAAATTCtAAATT : 2085
BjTT8A-d_g : TAATAAGATAAATGACAAAAATTTAAAAATcATTAATATAATGTGTAATTAATTAAGAGCACCACCAAAATACAAATAAAAAGAAAAATTCtAAATT : 2088
BjTT8A-y_g : TAATAAGATAAATGACAAAAATTTAAAAATcATTAATATAATGTGTAATTAATTAAGAGCACCACCAAAATACAAATAAAAAGAAAAATTCtAAATT : 2088
BjTT8A-y_r : TAATAAGATAAATGACAAAAATTTAAAAATcATTAATATAATGTGTAATTAATTAAGAGCACCACCAAAATACAAATAAAAAGAAAAATTCtAAATT : 2088
TAATAAGATAAATGAC AAAAtATTTAAAAATcATTAATATAATGTGTAATTAATTAAGAGCACCACCAAAATACAAATAAAAAGAA AAATTCtAAATT

```

\* 2200

```

BrTT8A-b_g : TGGAGTTTTGAGTAGTGAACCTCAAATATGAAGTTTCATTCTTTAAAACTCtAAATTCtAAGTTTGAAGTTTTAAAGTTATT-TTTTGGAGAGAAAA : 2181
BrTT8A-y_g : TGGAGTTTTGAGTAGTGAACCTCAAATATGAAGTTTCATTCTTTAAAACTCtAAATTCtAAGTTTGAAGTTTTAAAGTTATT-TTTTGGAGAGAAA : 2192
BnTT8A-b_g : TGGAGTTTTGAGTAGTGAACCTCAAATATGAAGTTTCATTCTTTAAAACTCtAAATTCtAAGTTTGAAGTTTTAAAGTTATT-TTTTGGAGAGAAA : 2180
BnTT8A-y_g : TGGAGTTTTGAGTAGTGAACCTCAAATATGAAGTTTCATTCTTTAAAACTCtAAATTCtAAGTTTGAAGTTTTAAAGTTATT-TTTTGGAGAGAAA : 2180
BjTT8A-d_g : TGGAGTTTTGAGTAGTGAACCTCAAATATGAAGTTTCATTCTTTAAAACTCtAAATTCtAAGTTTGAAGTTTTAAAGTTATT-TTTTGGAGAGAAA : 2183
BjTT8A-y_g : TGGAGTTTTGAGTAGTGAACCTCAAATATGAAGTTTCATTCTTTAAAACTCtAAATTCtAAGTTTGAAGTTTTAAAGTTATT-TTTTGGAGAGAAA : 2183
BjTT8A-y_r : TGGAGTTTTGAGTAGTGAACCTCAAATATGAAGTTTCATTCTTTAAAACTCtAAATTCtAAGTTTGAAGTTTTAAAGTTATT-TTTTGGAGAGAAA : 2183
TGGAGTTTTGAGTAGTGAACCTCAAATATGAAGTTTCATT TTTAAAACTC AAATTCtAAGTTTGAAGTTTTAAAGTTATT TTTTGGAGAG AAA

```

\* 2300

```

BrTT8A-b_g : AAACCTTATATTTGAAGTCATAGAGTTTCATTGGAGATGTTATTAGAGAAAAAAA---ATATATATATACAGAAACATCAACCCtTCGCAGTC : 2274
BrTT8A-y_g : AAACCTTATATTTGAAGTTATAGAGTTTCATTGGAGATATTCTTAGAGAAAAAAA---ATAAATATATACAGAAACATCAACCCtTCGCAGTC : 2284
BnTT8A-b_g : AAACCTTATATTTGAAGTCATAGAGTTTCATTGGAGATGTTATTAGAGAAAAAAAATATATATATATACAGAAACATCAACCCtTCGCAGTC : 2276
BnTT8A-y_g : AAACCTTATATTTGAAGTCATAGAGTTTCATTGGAGATGCTATTAGAGAAAAAAAATATATATATATACAGAAACATCAACCCtTCGCAGTC : 2276
BjTT8A-d_g : AAACCTTATATTTGAAGTCATAGAGTTTCATTGGAGATGTTATTAGAGAAAAAAA---ATATATATATACAGAAACATCAACCCtTCGCAGTC : 2275
BjTT8A-y_g : AAACCTTATATTTGAAGTCATAGAGTTTCATTGGAGATGTTATTAGAGAAAAAAA---ATATATATATACAGAAACATCAACCCtTCGCAGTC : 2275
BjTT8A-y_r : AAACCTTATATTTGAAGTCATAGAGTTTCATTGGAGATGTTATTAGAGAAAAAAA---ATATATATATACAGAAACATCAACCCtTCGCAGTC : 2275
AAACCTtTATATTTGAAGTCAtAGAGTTTCATTGGAGATg TaTTAGAGAAAAAAA AtAtATATATACAGAAACATCAACCCtTCGCAGTC

```

\* 2400

```

BrTT8A-b_g : ATATGAT-AAAAAATATAGTTTTTCGATTACATTAATAACACACCAAAATTATGTAAAACtATACAACCTAATGAAAATATGCATAAGCGGGAGAAC : 2369
BrTT8A-y_g : ATATGAT-AAAAAATATAGTTTTTCGATTACATTAATAACACACCAAAATTATGTAAAACtATACAACCTAATGAAAATATGCATAAGCGGGAGAAC : 2379
BnTT8A-b_g : ATATGAT-AAAAAATATAGTTTTTCGATTACATTAATAACACACCAAAATTATGTAAAACtATACAACCTAATGAAAATATGCATAAGCGGGAGAAC : 2371
BnTT8A-y_g : ATATGAT-AAAAAATATAGTTTTTCGATTACATTAATAACACACCAAAATTATGTAAAACtATACAACCTAATGAAAATATGCATAAGCGGGAGAAC : 2371
BjTT8A-d_g : ATATGATAAAAAAATATAGTTTTTCGATTACATTAATAACACACCAAAATTATGTAAAACtATACAACCTAATGAAAATATGCATAAGCGGGAGAAC : 2371
BjTT8A-y_g : ATATGATAAAAAAATATAGTTTTTCGATTACATTAATAACACACCAAAATTATGTAAAACtATACAACCTAATGAAAATATGCATAAGCGGGAGAAC : 2371
BjTT8A-y_r : ATATGATAAAAAAATATAGTTTTTCGATTACATTAATAACACACCAAAATTATGTAAAACtATACAACCTAATGAAAATATGCATAAGCGGGAGAAC : 2371
ATATGAT AAAAAATATAGTTTTTCGATTACATTAATA ACACCAAAATTATGTAAAACtATACAACCTAATGAAAATATGCATAAGCGGGAGAAC

```

## ext ron6 \*

```

BrTT8A-b_g : CAGGGAGATGcATGcATGATATATTGTGTTTGATGTGAAGGTCAAAGAGAGTGAAGAGTTTGTGTGAGCACATAAAGAGTTTCTTCCACAACCACC : 2465
BrTT8A-y_g : CAGGGAGATGcATGcATGATATATTGTGTTTGATGTGAAGGTCAAAGAGAGTGAAGAGTTTGTGTGAGCACATAAAGAGTTTCTTCCACAACCACC : 2475
BnTT8A-b_g : CAGGGAGATGcATGcATGATATATTGTGTTTGATGTGAAGGTCAAAGAGAGTGAAGAGTTTGTGTGAGCACATAAAGAGTTTCTTCCACAACCACC : 2467
BnTT8A-y_g : CAGGGAGATGcATGcATGATATATTGTGTTTGATGTGAAGGTCAAAGAGAGTGAAGAGTTTGTGTGAGCACATAAAGAGTTTCTTCCACAACCACC : 2467
BjTT8A-d_g : CAGGGAGATGcATGcATGATATATTGTGTTTGATGTGAAGGTCAAAGAGAGTGAAGAGTTTGTGTGAGCACATAAAGAGTTTCTTCCACAACCACC : 2467
BjTT8A-y_g : CAGGGAGATGcATGcATGATATATTGTGTTTGATGTGAAGGTCAAAGAGAGTGAAGAGTTTGTGTGAGCACATAAAGAGTTTCTTCCACAACCACC : 2467
BjTT8A-y_r : CAGGGAGATGcATGcATGATATATTGTGTTTGATGTGAAGGTCAAAGAGAGTGAAGAGTTTGTGTGAGCACATAAAGAGTTTCTTCCACAACCACC : 2467
CAGGGAGATGgATGcATGATATATTGTGTTTGATGTGAAGGTCAAAGAGAGTGAAGAGTTTGTGTGAGCACATAAAGAGTTTCTTCCACAACCACC

```

\* 2500

```

BrTT8A-b_g : CGAAGTCAAACAcTAAGCCTACTCTTTCTGAACACTTCATCAACGAAGAGCATGAAGAAGACGAAGAAGAAGTAGAAGAAGAAGAAATGACAATGT : 2561
BrTT8A-y_g : CGAAGTCAAACAcTAAGCCTACTCTTTCTGAACACTTCATCAACGAAGAGCATGAAGAAGACGAAGAAGAAGTAGAAGAAGAAGAAATGACAATGT : 2571
BnTT8A-b_g : CGAAGTCAAACAcTAAGCCTACTCTTTCTGAACACTTCATCAACGAAGAGCATGAAGAAGACGAAGAAGAAGTAGAAGAAGAAGAAATGACAATGT : 2563
BnTT8A-y_g : CGAAGTCAAACAcTAAGCCTACTCTTTCTGAACACTTCATCAACGAAGAGCATGAAGAAGACGAAGAAGAAGTAGAAGAAGAAGAAATGACAATGT : 2563
BjTT8A-d_g : CGAAGTCAAACAcTAAGCCTACTCTTTCTGAACACTTCATCAACGAAGAGCATGAAGAAGACGAAGAAGAAGTAGAAGAAGAAGAAATGACAATGT : 2563
BjTT8A-y_g : CGAAGTCAAACAcTAAGCCTACTCTTTCTGAACACTTCATCAACGAAGAGCATGAAGAAGACGAAGAAGAAGTAGAAGAAGAAGAAATGACAATGT : 2563
BjTT8A-y_r : CGAAGTCAAACAcTAAGCCTACTCTTTCTGAACACTTCATCAACGAAGAGCATGAAGAAGACGAAGAAGAAGTAGAAGAAGAAGAAATGACAATGT : 2563
CGAAGTCAAACAcTAAGCCTACTCTTTCTGAACACTTCATCAACGAAGAGCATGAAGAAGACGAAGAAGAAGTAGAAGAAGAAGAAATGACAATGT

```

2600 \*

BrTT8A-b\_g : CAGAAGAGATAAGACTTGGTTCTCCTGATGACGATGACGTCTCCAATCAAAATCTACTCTCTGATTTCATATAGAAGCAACCAATAGTTTAGGTA : 2657  
 BrTT8A-y\_g : CAGAAGAGATAAGACTTGGTTCTCCTGATGACGATGACGTCTCCAATCAAAATCTACTCTCTGATTTCATATAGAAGCAACCAATAGTTTAGGTA : 2667  
 BnTT8A-b\_g : CAGAAGAGATAAGACTTGGTTCTCCTGATGACGATGACGTCTCCAATCAAAATCTACTCTCTGATTTCATATAGAAGCAACCAATAGTTTAGGTA : 2659  
 BnTT8A-y\_g : CAGAAGAGATAAGACTTGGTTCTCCTGATGACGATGACGTCTCCAATCAAAATCTACTCTCTGATTTCATATAGAAGCAACCAATAGTTTAGGTA : 2659  
 BjTT8A-d\_g : CAGAAGAGATAAGACTTGGTTCTCCTGATGACGATGACGTCTCCAATCAAAATCTACTCTCTGATTTCATATAGAAGCAACCAATAGTTTAGGTA : 2659  
 BjTT8A-y\_g : CAGAAGAGATAAGACTTGGTTCTCCTGATGACGATGACGTCTCCAATCAAAATCTACTCTCTGATTTCATATAGAAGCAACCAATAGTTTAGGTA : 2659  
 BjTT8A-y\_r : CAGAAGAGATAAGACTTGGTTCTCCTGATGACGATGACGTCTCCAATCAAAATCTACTCTCTGATTTCATATAGAAGCAACCAATAGTTTAGGTA : 2659  
 CAGAAGAGATAAGACTTGGTTCTCCTGATGACGATGACGTCTCCAATCAAAATCTACTCTCTGATTTCATATAGAAGCAACCAATAGTTTAGGTA

2700 \*

BrTT8A-b\_g : TACCGTACACACCTTCTTATTACATTAAATTAGTTAACAATATCATTATAATTAATTTTCTAATAATAAAATTTTTTAACTGGTTCTCATGTCTG : 2753  
 BrTT8A-y\_g : TACCGTACACACCTTCTTATTACATTAAATTAGTTAACAATATCATTATAATTAATTTTCTAATAATAAAATTTTTTAACTGGTTCTCATGTCTG : 2763  
 BnTT8A-b\_g : TACCGTACACACCTTCTTATTACATTAAATTAGTTAACAATATCATTATAATTAATTTTCTAATAATAAAATTTTTTAACTGGTTCTCATGTCTG : 2755  
 BnTT8A-y\_g : TACCGTACACACCTTCTTATTACATTAAATTAGTTAACAATATCATTATAATTAATTTTCTAATAATAAAATTTTTTAACTGGTTCTCATGTCTG : 2755  
 BjTT8A-d\_g : TACCGTACACACCTTCTTATTACATTAAATTAGTTAACAATATCATTATAATTAATTTTCTAATAATAAAATTTTTTAACTGGTTCTCATGTCTG : 2755  
 BjTT8A-y\_g : TACCGTACACACCTTCTTATTACATTAAATTAGTTAACAATATCATTATAATTAATTTTCTAATAATAAAATTTTTTAACTGGTTCTCATGTCTG : 2755  
 BjTT8A-y\_r : TACCGTACACACCTTCTTATTACATTAAATTAGTTAACAATATCATTATAATTAATTTTCTAATAATAAAATTTTTTAACTGGTTCTCATGTCTG : 2755  
 TACCGTACACACCTTCTTATTACATTAAATTAGTTAACAATATCATTATAATTAATTTTCTAATAATAAAATTTTTTAACTGGTTCTCATGTCTG

2800 ext ron7 \*

BrTT8A-b\_g : GTAATTCTAACATCTATCATTTGATAAAATAGATACACACATGGACATGATGAATCTAATGGAGGAAGCGGAAATTATTCTCAGACAGTATCAACA : 2849  
 BrTT8A-y\_g : GTAATTCTAACATCTATCATTTGATAAAATAGATACACACATGGACATGATGAATCTAATGGAGGAAGCGGAAATTATTCTCAGACAGTATCAACA : 2859  
 BnTT8A-b\_g : GTAATTCTAACATCTATCATTTGATAAAATAGATACACACATGGACATGATGAATCTAATGGAGGAAGCGGAAATTATTCTCAGACAGTATCAACA : 2851  
 BnTT8A-y\_g : GTAATTCTAACATCTATCATTTGATAAAATAGATACACACATGGACATGATGAATCTAATGGAGGAAGCGGAAATTATTCTCAGACAGTATCAACA : 2851  
 BjTT8A-d\_g : GTAATTCTAACATCTATCATTTGATAAAATAGATACACACATGGACATGATGAATCTAATGGAGGAAGCGGAAATTATTCTCAGACAGTATCAACA : 2851  
 BjTT8A-y\_g : GTAATTCTAACATCTATCATTTGATAAAATAGATACACACATGGACATGATGAATCTAATGGAGGAAGCGGAAATTATTCTCAGACAGTATCAACA : 2851  
 BjTT8A-y\_r : GTAATTCTAACATCTATCATTTGATAAAATAGATACACACATGGACATGATGAATCTAATGGAGGAAGCGGAAATTATTCTCAGACAGTATCAACA : 2851  
 GTAATTCTAACATCTATCATTTGATAAAATAGATACACACATGGACATGATGAATCTAATGGAGGAAGCGGAAATTATTCTCAGACAGTATCAACA

2900 \*

BrTT8A-b\_g : CTTCTCATGTGACAAACCCACAAGTCTTCTTTTCAGATTCAGTTTCCACATCTTCTTACGTTCAATCATCGTTTGTCTCGTGGAGAGTTGAGAATGTC : 2945  
 BrTT8A-y\_g : CTTCTCATGTGACAAACCCACAAGTCTTCTTTTCAGATTCAGTTTCCACATCTTCTTACGTTCAATCATCGTTTGTCTCGTGGAGAGTTGAGAATGTC : 2955  
 BnTT8A-b\_g : CTTCTCATGTGACAAACCCACAAGTCTTCTTTTCAGATTCAGTTTCCACATCTTCTTACGTTCAATCATCGTTTGTCTCGTGGAGAGTTGAGAATGTC : 2947  
 BnTT8A-y\_g : CTTCTCATGTGACAAACCCACAAGTCTTCTTTTCAGATTCAGTTTCCACATCTTCTTACGTTCAATCATCGTTTGTCTCGTGGAGAGTTGAGAATGTC : 2947  
 BjTT8A-d\_g : CTTCTCATGTGACAAACCCACAAGTCTTCTTTTCAGATTCAGTTTCCACATCTTCTTACGTTCAATCATCGTTTGTCTCGTGGAGAGTTGAGAATGTC : 2947  
 BjTT8A-y\_g : CTTCTCATGTGACAAACCCACAAGTCTTCTTTTCAGATTCAGTTTCCACATCTTCTTACGTTCAATCATCGTTTGTCTCGTGGAGAGTTGAGAATGTC : 2947  
 BjTT8A-y\_r : CTTCTCATGTGACAAACCCACAAGTCTTCTTTTCAGATTCAGTTTCCACATCTTCTTACGTTCAATCATCGTTTGTCTCGTGGAGAGTTGAGAATGTC : 2947  
 CTTCTCATGTGACAAACCCACAAGTCTTCTTTTCAGATTCAGTTTCCACATCTTCTTACGTTCAATCATCGTTTGTCTCGTGGAGAGTTGAGAATGTC

3000 \*

BrTT8A-b\_g : AAAGAGCATCAGCAATATCAGCGAGTGGAGAAAGCGGCGTGGTCATCGTCGCAATGGATGCTCAAACACATAATCTTGAAAGTTCCTTTCCCTCCAC : 3041  
 BrTT8A-y\_g : AAAGAGCATCAGCAATATCAGCGAGTGGAGAAAGCGGCGTGGTCATCGTCGCAATGGATGCTCAAACACATAATCTTGAAAGTTCCTTTCCCTCCAC : 3051  
 BnTT8A-b\_g : AAAGAGCATCAGCAATATCAGCGAGTGGAGAAAGCGGCGTGGTCATCGTCGCAATGGATGCTCAAACACATAATCTTGAAAGTTCCTTTCCCTCCAC : 3043  
 BnTT8A-y\_g : AAAGAGCATCAGCAATATCAGCGAGTGGAGAAAGCGGCGTGGTCATCGTCGCAATGGATGCTCAAACACATAATCTTGAAAGTTCCTTTCCCTCCAC : 3043  
 BjTT8A-d\_g : AAAGAGCATCAGCAATATCAGCGAGTGGAGAAAGCGGCGTGGTCATCGTCGCAATGGATGCTCAAACACATAATCTTGAAAGTTCCTTTCCCTCCAC : 3043  
 BjTT8A-y\_g : AAAGAGCATCAGCAATATCAGCGAGTGGAGAAAGCGGCGTGGTCATCGTCGCAATGGATGCTCAAACACATAATCTTGAAAGTTCCTTTCCCTCCAC : 3043  
 BjTT8A-y\_r : AAAGAGCATCAGCAATATCAGCGAGTGGAGAAAGCGGCGTGGTCATCGTCGCAATGGATGCTCAAACACATAATCTTGAAAGTTCCTTTCCCTCCAC : 3043  
 AAAGAGCATCAGCAATATCAGCGAGTGGAGAAAGCGGCGTGGTCATCGTCGCAATGGATGCTCAAACACATAATCTTGAAAGTTCCTTTCCCTCCAC

↓ insertion strat 3100 \*

BrTT8A-b\_g : G----- : 3042  
 BrTT8A-y\_g : G----- : 3052  
 BnTT8A-b\_g : G----- : 3044  
 BnTT8A-y\_g : G----- : 3044  
 BjTT8A-d\_g : G----- : 3044  
 BjTT8A-y\_g : GTCCCGTCGTCCTCTTCTGTATCTTCTCCGGTGGCCGACGGTGGGCTCGTCCCGTCGGTCGCCACCCCCACTTCGCCCCGCGGTATCCAAATCCT : 3139  
 BjTT8A-y\_r : GTCCCGTCGTCCTCTTCTGTATCTTCTCCGGTGGCCGACGGTGGGCTCGTCCCGTCGGTCGCCACCCCCACTTCGCCCCGCGGTATCCAAATCCT : 3139  
 G

3200 \*

BrTT8A-b\_g : ----- : -  
 BrTT8A-y\_g : ----- : -  
 BnTT8A-b\_g : ----- : -  
 BnTT8A-y\_g : ----- : -  
 BjTT8A-d\_g : ----- : -  
 BjTT8A-y\_g : CTCCCTGTCAAGATACGGTCACCTTACCTCCTCTTTGCTTCTCCTTCTCTGGTTTTACCGGATTGCGGCCGGATCCGGTGACCAAATCGATTTTT : 3235  
 BjTT8A-y\_r : CTCCCTGTCAAGATACGGTCACCTTACCTCCTCTTTGCTTCTCCTTCTCTGGTTTTACCGGATTGCGGCCGGATCCGGTGACCAAATCGATTTTT : 3235

3300 \*

BrTT8A-b\_g : ----- : -  
 BrTT8A-y\_g : ----- : -  
 BnTT8A-b\_g : ----- : -  
 BnTT8A-y\_g : ----- : -  
 BjTT8A-d\_g : ----- : -  
 BjTT8A-y\_g : GGGTGTGTCCCAATGTCTCTGGAGAGAGGGCGAGGTCGTGACTGTCCGGAAGCTTACAGGAGGCACCAATTGTTTTGTAGATCTAGGGTTTTGTTT : 3331  
 BjTT8A-y\_r : GGGTGTGTCCCAATGTCTCTGGAGAGAGGGCGAGGTCGTGACTGTCCGGAAGCTTACAGGAGGCACCAATTGTTTTGTAGATCTAGGGTTTTGTTT : 3331

3400 \*

BrTT8A-b\_g : ----- : -  
 BrTT8A-y\_g : ----- : -  
 BnTT8A-b\_g : ----- : -  
 BnTT8A-y\_g : ----- : -  
 BjTT8A-d\_g : ----- : -  
 BjTT8A-y\_g : TGTGCGGGTTCTGGGTCAGATCTGTGTGCGGAGGTTTGCCCGACCGAGAGCGTCGTGCTCTCTTCCACCGGGT-TTATCGCCTCCTCTGCTCTCCC : 3426  
 BjTT8A-y\_r : TGTGCGGGTTCTGGGTCAGATCTGTGTGCGGAGGTTTGCCCGACCGAGAGCGTCGTGCTCTCTTCCACCGGGT-TTATCGCCTCCTCTGCTCTCCC : 3427

|            |                                                   |   |      |
|------------|---------------------------------------------------|---|------|
|            | 3500                                              | * |      |
| BrTT8A-b_g | -----                                             | : | -    |
| BrTT8A-y_g | -----                                             | : | -    |
| BnTT8A-b_g | -----                                             | : | -    |
| BnTT8A-y_g | -----                                             | : | -    |
| BjTT8A-d_g | -----                                             | : | -    |
| BjTT8A-y_g | CTGTCTCTCTCTCTTCGGTTGCTGTTGCAGGTGCTTCCCCATCTTCGTA | : | 3522 |
| BjTT8A-y_r | CTGTCTCTCTCTCTTCGGTTGCTGTTGCAGGTGCTTCCCCATCTTCGTA | : | 3523 |
|            | 3600                                              |   |      |
| BrTT8A-b_g | -----                                             | : | -    |
| BrTT8A-y_g | -----                                             | : | -    |
| BnTT8A-b_g | -----                                             | : | -    |
| BnTT8A-y_g | -----                                             | : | -    |
| BjTT8A-d_g | -----                                             | : | -    |
| BjTT8A-y_g | TCCTCCCGTTCTGATGTCTGAGCATTACCATGGTGTGGTGGTGATCC   | : | 3618 |
| BjTT8A-y_r | TCCTCCCGTTCTGATGTCTGAGCATTACCATGGTGTGGTGGTGATCC   | : | 3619 |
|            | 3700                                              | * |      |
| BrTT8A-b_g | -----                                             | : | -    |
| BrTT8A-y_g | -----                                             | : | -    |
| BnTT8A-b_g | -----                                             | : | -    |
| BnTT8A-y_g | -----                                             | : | -    |
| BjTT8A-d_g | -----                                             | : | -    |
| BjTT8A-y_g | TCGTCAGATCTCCATAGTCGGGTCTAGCCTCTCTTCCACCTGCTGAT   | : | 3712 |
| BjTT8A-y_r | TCGTCAGATCTCCATAGTCGGGTCTAGCCTCTCTTCCACCTGCTGAT   | : | 3715 |
|            | 3800                                              | * |      |
| BrTT8A-b_g | -----                                             | : | -    |
| BrTT8A-y_g | -----                                             | : | -    |
| BnTT8A-b_g | -----                                             | : | -    |
| BnTT8A-y_g | -----                                             | : | -    |
| BjTT8A-d_g | -----                                             | : | -    |
| BjTT8A-y_g | AGCCGTTACCTGCCTTTCCGATGCTCTGCAGCCAATCCTTCTGTGCGG  | : | 3808 |
| BjTT8A-y_r | AGCCGTTACCTGCCTTTCCGATGCTCTGCAGCCAATCCTTCTGTGCGG  | : | 3811 |
|            | 3900                                              | * |      |
| BrTT8A-b_g | -----                                             | : | -    |
| BrTT8A-y_g | -----                                             | : | -    |
| BnTT8A-b_g | -----                                             | : | -    |
| BnTT8A-y_g | -----                                             | : | -    |
| BjTT8A-d_g | -----                                             | : | -    |
| BjTT8A-y_g | CAGCCTGTCCCTCACCTGCTCTTCATCTCCTGGCTTATTTGTGTTGGG  | : | 3904 |
| BjTT8A-y_r | CAGCCTGTCCCTCACCTGCTCTTCATCTCCTGGCTTATTTGTGTTGGG  | : | 3907 |
|            | 4000                                              | * |      |
| BrTT8A-b_g | -----                                             | : | -    |
| BrTT8A-y_g | -----                                             | : | -    |
| BnTT8A-b_g | -----                                             | : | -    |
| BnTT8A-y_g | -----                                             | : | -    |
| BjTT8A-d_g | -----                                             | : | -    |
| BjTT8A-y_g | TGGAGTAGATTTCAC                                   | : | 3999 |
| BjTT8A-y_r | TGGAGTAGATTTCAC                                   | : | 4003 |
|            | 4100                                              | * |      |
| BrTT8A-b_g | -----                                             | : | -    |
| BrTT8A-y_g | -----                                             | : | -    |
| BnTT8A-b_g | -----                                             | : | -    |
| BnTT8A-y_g | -----                                             | : | -    |
| BjTT8A-d_g | -----                                             | : | -    |
| BjTT8A-y_g | GCGGGTCCTTTGGACCATTC                              | : | 4095 |
| BjTT8A-y_r | GCGGGTCCTTTGGACCATTC                              | : | 4099 |
|            | 4200                                              | * |      |
| BrTT8A-b_g | -----                                             | : | -    |
| BrTT8A-y_g | -----                                             | : | -    |
| BnTT8A-b_g | -----                                             | : | -    |
| BnTT8A-y_g | -----                                             | : | -    |
| BjTT8A-d_g | -----                                             | : | -    |
| BjTT8A-y_g | TAAATGTTTGCTCCTGGTATCTTCAATTGTCAAGCTTTGGTCACAT    | : | 4191 |
| BjTT8A-y_r | TAAATGTTTGCTCCTGGTATCTTCAATTGTCAAGCTTTGGTCACAT    | : | 4195 |
|            | 4300                                              | * |      |
| BrTT8A-b_g | -----                                             | : | -    |
| BrTT8A-y_g | -----                                             | : | -    |
| BnTT8A-b_g | -----                                             | : | -    |
| BnTT8A-y_g | -----                                             | : | -    |
| BjTT8A-d_g | -----                                             | : | -    |
| BjTT8A-y_g | TTTTTTTGTGGCTCTTTTAGGCAGCTTGCTTTGATAAGCTTCTTAGAT  | : | 4287 |
| BjTT8A-y_r | TTTTTTTGTGGCTCTTTTAGGCAGCTTGCTTTGATAAGCTTCTTAGAT  | : | 4291 |

\* ↓ insertion end

```

BrTT8A-b_g : -----ACAACTAAAAATAAGAGGCTACCGCGAGAAGAGCTTAACCATGTGGTGGCCGAGCGACGCA : 3105
BrTT8A-y_g : -----ACAACTAAAAATAAGAGGCTACCGCGAGAAGAGCTTAACCATGTGGTGGCCGAGCGACGCA : 3115
BnTT8A-b_g : -----ACAACTAAAAATAAGAGGCTACCGCGAGAAGAGCTTAACCATGTGGTGGCCGAGCGACGCA : 3107
BnTT8A-y_g : -----ACAACTAAAAATAAGAGGCTACCGCGAGAAGAGCTTAACCATGTGGTGGCCGAGCGACGCA : 3107
BjTT8A-d_g : -----ACAACTAAAAATAAGAGGCTACCGCGAGAAGAGCTTAACCATGTGGTGGCCGAGCGACGCA : 3107
BjTT8A-y_g : TCTAATGAAAATTCACATACTTAACAAAAAATAAACTAAAAATAAGAGGCTACCGCGAGAAGAGCTTAACCATGTGGTGGCCGAGCGACGCA : 4383
BjTT8A-y_r : TCTAATGAAAATTCACATACTTAACAAAAAATAAACTAAAAATAAGAGGCTACCGCGAGAAGAGCTTAACCATGTGGTGGCCGAGCGACGCA : 4386
                A AACTAAAAATAAGAGGCTACCGCGAGAAGAGCTTAACCATGTGGTGGCCGAGCGACGCA

```

\* 4500

```

BrTT8A-b_g : GAAGAGAGAAGCTAAATGAGAGATTCAACGTTGAGATCATTTGGTTCCATTTGTGACCAAGATGGATAAAAGTCTCGATCCTTGGAGACACCATTG : 3201
BrTT8A-y_g : GAAGAGAGAAGCTAAATGAGAGATTCAACGTTGAGATCATTTGGTTCCATTTGTGACCAAGATGGATAAAAGTCTCGATCCTTGGAGACACCATTG : 3211
BnTT8A-b_g : GAAGAGAGAAGCTAAATGAGAGATTCAACGTTGAGATCATTTGGTTCCATTTGTGACCAAGATGGATAAAAGTCTCGATCCTTGGAGACACCATTG : 3203
BnTT8A-y_g : GAAGAGAGAAGCTAAATGAGAGATTCAACGTTGAGATCATTTGGTTCCATTTGTGACCAAGATGGATAAAAGTCTCGATCCTTGGAGACACCATTG : 3203
BjTT8A-d_g : GAAGAGAGAAGCTAAATGAGAGATTCAACGTTGAGATCATTTGGTTCCATTTGTGACCAAGATGGATAAAAGTCTCGATCCTTGGAGACACCATTG : 3203
BjTT8A-y_g : GAAGAGAGAAGCTAAATGAGAGATTCAACGTTGAGATCATTTGGTTCCATTTGTGACCAAGATGGATAAAAGTCTCGATCCTTGGAGACACCATTG : 4479
BjTT8A-y_r : GAAGAGAGAAGCTAAATGAGAGATTCAACGTTGAGATCATTTGGTTCCATTTGTGACCAAGATGGATAAAAGTCTCGATCCTTGGAGACACCATTG : 4482
                GAAGAGAGAAGCTAAATGAGAGATTCAACGTTGAGATCATTTGGTTCCATTTGTGACCAAGATGGATAAAAGTCTCGATCCTTGGAGACACCATTG

```

\* 4600

```

BrTT8A-b_g : AATACGTAAACCATCTTTCTAAGAGGATACATGAGCTGGAATCTACTCATCACGAGCCAAACCAAAAGCGGATGCGTATCGGTAAAGGAAGAACTT : 3297
BrTT8A-y_g : AATACGTAAACCATCTTTCTAAGAGGATACATGAGCTGGAATCTACTCATCACGAGCCAAACCAAAAGCGGATGCGTATCGGTAAAGGAAGAACTT : 3307
BnTT8A-b_g : AATACGTAAACCATCTTTCTAAGAGGATACATGAGCTGGAATCTACTCATCACGAGCCAAACCAAAAGCGGATGCGTATCGGTAAAGGAAGAACTT : 3299
BnTT8A-y_g : AATACGTAAACCATCTTTCTAAGAGGATACATGAGCTGGAATCTACTCATCACGAGCCAAACCAAAAGCGGATGCGTATCGGTAAAGGAAGAACTT : 3299
BjTT8A-d_g : AATACGTAAACCATCTTTCTAAGAGGATACATGAGCTGGAATCTACTCATCACGAGCCAAACCAAAAGCGGATGCGTATCGGTAAAGGAAGAACTT : 3299
BjTT8A-y_g : AATACGTAAACCATCTTTCTAAGAGGATACATGAGCTGGAATCTACTCATCACGAGCCAAACCAAAAGCGGATGCGTATCGGTAAAGGAAGAACTT : 4575
BjTT8A-y_r : AATACGTAAACCATCTTTCTAAGAGGATACATGAGCTGGAATCTACTCATCACGAGCCAAACCAAAAGCGGATGCGTATCGGTAAAGGAAGAACTT : 4578
                AATACGTAAACCATCTTTCTAAGAGGATACATGAGCTGGAATCTACTCATCACGAGCCAAACCAAAAGCGGATGCGTATCGGTAAAGGAAGAACTT

```

\* 4700

```

BrTT8A-b_g : GGGAAGAGGTGGAGGTTTCCATTATAGAGAGCGATGTTTGTGTAGAGATGAGATGCGAGTACCGAGATGGTTTATTGCTCAACATTCTTCAGGTAC : 3393
BrTT8A-y_g : GGGAAGAGGTGGAGGTTTCCATTATAGAGAGCGATGTTTGTGTAGAGATGAGATGCGAGTACCGAGATGGTTTATTGCTCAACATTCTTCAGGTAC : 3403
BnTT8A-b_g : GGGAAGAGGTGGAGGTTTCCATTATAGAGAGCGATGTTTGTGTAGAGATGAGATGCGAGTACCGAGATGGTTTATTGCTCAACATTCTTCAGGTAC : 3395
BnTT8A-y_g : GGGAAGAGGTGGAGGTTTCCATTATAGAGAGCGATGTTTGTGTAGAGATGAGATGCGAGTACCGAGATGGTTTATTGCTCAACATTCTTCAGGTAC : 3395
BjTT8A-d_g : GGGAAGAGGTGGAGGTTTCCATTATAGAGAGCGATGTTTGTGTAGAGATGAGATGCGAGTACCGAGATGGTTTATTGCTCAACATTCTTCAGGTAC : 3395
BjTT8A-y_g : GGGAAGAGGTGGAGGTTTCCATTATAGAGAGCGATGTTTGTGTAGAGATGAGATGCGAGTACCGAGATGGTTTATTGCTCAACATTCTTCAGGTAC : 4671
BjTT8A-y_r : GGGAAGAGGTGGAGGTTTCCATTATAGAGAGCGATGTTTGTGTAGAGATGAGATGCGAGTACCGAGATGGTTTATTGCTCAACATTCTTCAGGTAC : 4674
                GGGAAGAGGTGGAGGTTTCCATTATAGAGAGCGATGTTTGTGTAGAGATGAGATGCGAGTACCGAGATGGTTTATTGCTCAACATTCTTCAGGTAC

```

\* 4800

```

BrTT8A-b_g : TTAAGGAGCTGGGTATAGAGACCACTGCGGTTTCACACTGCCTTGAACGACAATCATTTTGAGGCAGAGATAAGGGCGAAAAGTGAGAGGGAAGAAAC : 3489
BrTT8A-y_g : TTAAGGAGCTGGGTATAGAGACCACTGCGGTTTCACACTGCCTTGAACGACAATCATTTTGAGGCAGAGATAAGGGCGAAAAGTGAGAGGGAAGAAAC : 3499
BnTT8A-b_g : TTAAGGAGCTGGGTATAGAGACCACTGCGGTTTCACACTGCCTTGAACGACAATCATTTTGAGGCAGAGATAAGGGCGAAAAGTGAGAGGGAAGAAAC : 3491
BnTT8A-y_g : TTAAGGAGCTGGGTATAGAGACCACTGCGGTTTCACACTGCCTTGAACGACAATCATTTTGAGGCAGAGATAAGGGCGAAAAGTGAGAGGGAAGAAAC : 3491
BjTT8A-d_g : TTAAGGAGCTGGGTATAGAGACCACTGCGGTTTCACACTGCCTTGAACGACAATCATTTTGAGGCAGAGATAAGGGCGAAAAGTGAGAGGGAAGAAAC : 3491
BjTT8A-y_g : TTAAGGAGCTGGGTATAGAGACCACTGCGGTTTCACACTGCCTTGAACGACAATCATTTTGAGGCAGAGATAAGGGCGAAAAGTGAGAGGGAAGAAAC : 4767
BjTT8A-y_r : TTAAGGAGCTGGGTATAGAGACCACTGCGGTTTCACACTGCCTTGAACGACAATCATTTTGAGGCAGAGATAAGGGCGAAAAGTGAGAGGGAAGAAAC : 4770
                TTAAGGAGCTGGGTATAGAGACCACTGCGGTTTCACACTGCCTTGAACGACAATCATTTTGAGGCAGAGATAAGGGCGAAAAGTGAGAGGGAAGAAAC

```

\* 3548

```

BrTT8A-b_g : CAACCATTTGCTGAGGTAAAAATAGCCATCCATCAAAATCATATATAATAATAAACTCTAG : 3548
BrTT8A-y_g : CAACCATTTGCTGAGGTAAAAATAGCCATCCATCAAAATCATATATAATAATAAACTCTAG : 3558
BnTT8A-b_g : CAACCATTTGCTGAGGTAAAAATAGCCATCCATCAAAATCATATATAATAATAAACTCTAG : 3550
BnTT8A-y_g : CAACCATTTGCTGAGGTAAAAATAGCCATCCATCAAAATCATATATAATAATAAACTCTAG : 3550
BjTT8A-d_g : CAACCATTTGCTGAGGTAAAAATAGCCATCCATCAAAATCATATATAATAATAAACTCTAG : 3550
BjTT8A-y_g : CAACCATTTGCTGAGGTAAAAATAGCCATCCATCAAAATCATATATAATAATAAACTCTAG : 4826
BjTT8A-y_r : CAACCATTTGCTGAGGTAAAAATAGCCATCCATCAAAATCATATATAATAATAAACTCTAG : 4829
                CAACCATTTGCTGAGGTAAAAATAGCCATCCATCAAAATCATATATAATAATAAACTCTAG

```
