# Supplementary material for: Metabolite Profiling and Transcriptome Analysis Provide Insight into Seed Coat Color in Brassica juncea
Source: MDPI journal article supplement (doi:10.3390/ijms22137215), 2021-07-05
Supplement: s1 [file s1]

1000 \*

BolTT8C-b : GCTATTTCTGCAAAGGTTTATTTCCCTTTTATTCATTCCACCCTACACTGTGCATCTATTTCTACTTATTTAGATATACGCAATTTTATATATATCTC : 1067

BolTT8C-y : GCTATTTCTGCAAAGGTTTATTTCCCTTTTATTCATTCCACCCTACACTGTGCATCTATTTCTACTTATTTAGATATACGCAATTTTATATATATCTC : 1067

BnaTT8C-b : GCTATTTCTGCAAAGGTTTATTTCCCTTTTATTCATTCCACCCTACACTGTGCATCTATTTCTACTTATTTAGATATACGCAATTTTATATATATCTC : 1067

BnaTT8C-y : GCTATTTCTGCAAAGGTTTATTTCCCTTTTATTCATTCCACCCTACACTGTGCATCTATTTCTACTTATTTAGATATACGCAATTTTATATATATCTC : 1067

BcaTT8C-b : GCTATTTCTGCAAAGGTTTATTTCCCTTTTATTCATTCCACCCTACACTGTGCATCTATTTCTACTTATTTAGATATACGCAATTTTATATATATCTC : 1067

BcaTT8C-y : GCTATTTCTGCAAAGGTTTATTTCCCTTTTATTCATTCCACCCTACACTGTGCATCTATTTCTACTTATTTAGATATACGCAATTTTATATATATCTC : 1067

1100 \*

BolTT8C-b : ATTCTTCAAACCTAATTAATTTTATCTTCGTCCTTACTTGAATGCTCGCTCTTTCCACATTAGAGTGCCAAAATTCAGGTAAATTTTCGCCGTCATTAA : 1164

BolTT8C-y : ATTCTTCAAACCTAATTAATTTTATCTTCGTCCTTACTTGAATGCTCGCTCTTTCCACATTAGAGTGCCAAAATTCAGGTAAATTTTCGCCGTCATTAA : 1164

BnaTT8C-b : ATTCTTCAAACCTAATTAATTTTATCTTCGTCCTTACTTGAATGCTCGCTCTTTCCACATTAGAGTGCCAAAATTCAGGTAAATTTTCGCCGTCATTAA : 1164

BnaTT8C-y : ATTCTTCAAACCTAATTAATTTTATCTTCGTCCTTACTTGAATGCTCGCTCTTTCCACATTAGAGTGCCAAAATTCAGGTAAATTTTCGCCGTCATTAA : 1164

BcaTT8C-b : ATTCTTCAAACCTAATTAATTTTATCTTCGTCCTTACTTGAATGCTCGCTCTTTCCACATTAGAGTGCCAAAATTCAGGTAAATTTTCGCCGTCATTAA : 1164

BcaTT8C-y : ATTCTTCAAACCTAATTAATTTTATCTTCGTCCTTACTTGAATGCTCGCTCTTTCCACATTAGAGTGCCAAAATTCAGGTAAATTTTCGCCGTCATTAA : 1164

1200 \*

BolTT8C-b : TTAATTATTTAATTTTTCGTAGAAACGAAGGTATCAATTAATAAAAAGTTATTTTACATGTTGACAAAAAGAAAGAGTTATTTTACATATTTGCAAT : 1261

BolTT8C-y : TTAATTATTTAATTTTTCGTAGAAACGAAGGTATCAATTAATAAAAAGTTATTTTACATGTTGACAAAAAGAAAGAGTTATTTTACATATTTGCAAT : 1261

BnaTT8C-b : TTAATTATTTAATTTTTCGTAGAAACGAAGGTATCAATTAATAAAAAGTTATTTTACATGTTGACAAAAAGAAAGAGTTATTTTACATATTTGCAAT : 1261

BnaTT8C-y : TTAATTATTTAATTTTTCGTAGAAACGAAGGTATCAATTAATAAAAAGTTATTTTACATGTTGACAAAAAGAAAGAGTTATTTTACATATTTGCAAT : 1261

BcaTT8C-b : TTAATTATTTAATTTTTCGTAGAAACGAAGGTATCAATTAATAAAAAGTTATTTTACATGTTGACAAAAAGAAAGAGTTATTTTACATATTTGCAAT : 1261

BcaTT8C-y : TTAATTATTTAATTTTTCGTAGAAACGAAGGTATCAATTAATAAAAAGTTATTTTACATGTTGACAAAAAGAAAGAGTTATTTTACATATTTGCAAT : 1261

1300 **ext ron5** \*

BolTT8C-b : TTTTGTGATGAAAAAACAATTAATAAACAGACAGTGGTTTGCATTCCCGTGCTTGATGGCGTTTGGAACTAGGCACAACGAACAAGGTA : 1358

BolTT8C-y : TTTTGTGATGAAAAAACAATTAATAAACAGACAGTGGTTTGCATTCCCGTGCTTGATGGCGTTTGGAACTAGGCACAACGAACAAGGTA : 1358

BnaTT8C-b : TTTTGTGATGAAAAAACAATTAATAAACAGACAGTGGTTTGCATTCCCGTGCTTGATGGCGTTTGGAACTAGGCACAACGAACAAGGTA : 1358

BnaTT8C-y : TTTTGTGATGAAAAAACAATTAATAAACAGACAGTGGTTTGCATTCCCGTGCTTGATGGCGTTTGGAACTAGGCACAACGAACAAGGTA : 1358

BcaTT8C-b : TTTTGTGATGAAAAAACAATTAATAAACAGACAGTGGTTTGCATTCCCGTGCTTGATGGCGTTTGGAACTAGGCACAACGAACAAGGTA : 1358

BcaTT8C-y : TTTTGTGATGAAAAAACAATTAATAAACAGACAGTGGTTTGCATTCCCGTGCTTGATGGCGTTTGGAACTAGGCACAACGAACAAGGTA : 1358

1400 \*

BolTT8C-b : AAAATCTCTATTATGTCGGTACCCAAAATGTAGACGAATATAGTCAGCTCATTCTATGTTACTTAGAGAAATAAGAAAAAATATATACAGAAACA : 1455

BolTT8C-y : AAAATCTCTATTATGTCGGTACCCAAAATGTAGACGAATATAGTCAGCTCATTCTATGTTACTTAGAGAAATAAGAAAAAATATATACAGAAACA : 1455

BnaTT8C-b : AAAATCTCTATTATGTCGGTACCCAAAATGTAGACGAATATAGTCAGCTCATTCTATGTTACTTAGAGAAATAAGAAAAAATATATACAGAAACA : 1455

BnaTT8C-y : AAAATCTCTATTATGTCGGTACCCAAAATGTAGACGAATATAGTCAGCTCATTCTATGTTACTTAGAGAAATAAGAAAAAATATATACAGAAACA : 1455

BcaTT8C-b : AAAATCTCTATTATGTCGGTACCCAAAATGTAGACGAATATAGTCAGCTCATTCTATGTTACTTAGAGAAATAAGAAAAAATATATACAGAAACA : 1455

BcaTT8C-y : AAAATCTCTATTATGTCGGTACCCAAAATGTAGACGAATATAGTCAGCTCATTCTATGTTACTTAGAGAAATAAGAAAAAATATATACAGAAACA : 1455

1500 \*

BolTT8C-b : TCAACCATTTCGCAGTCATATGATAAAAAATATAGTTTTTCGATTACATTATATACACAACCAATGATGTAAATATACAACCTAATGAAAATATGC : 1552

BolTT8C-y : TCAACCATTTCGCAGTCATATGATAAAAAATATAGTTTTTCGATTACATTATATACACAACCAATGATGTAAATATACAACCTAATGAAAATATGC : 1552

BnaTT8C-b : TCAACCATTTCGCAGTCATATGATAAAAAATATAGTTTTTCGATTACATTATATACACAACCAATGATGTAAATATACAACCTAATGAAAATATGC : 1552

BnaTT8C-y : TCAACCATTTCGCAGTCATATGATAAAAAATATAGTTTTTCGATTACATTATATACACAACCAATGATGTAAATATACAACCTAATGAAAATATGC : 1552

BcaTT8C-b : TCAACCATTTCGCAGTCATATGATAAAAAATATAGTTTTTCGATTACATTATATACACAACCAATGATGTAAATATACAACCTAATGAAAATATGC : 1552

BcaTT8C-y : TCAACCATTTCGCAGTCATATGATAAAAAATATAGTTTTTCGATTACATTATATACACAACCAATGATGTAAATATACAACCTAATGAAAATATGC : 1552

1600 **ext ron6**

BolTT8C-b : ATAAGAGGAAGAACCAGGGAGATGGATGCATGATATATTGTGTTTGTATGTGAAGGTCAAAGAGAGTGAAGAGTTTGTGACCACATAAAGAGTTTC : 1649

BolTT8C-y : ATAAGAGGAAGAACCAGGGAGATGGATGCATGATATATTGTGTTTGTATGTGAAGGTCAAAGAGAGTGAAGAGTTTGTGACCACATAAAGAGTTTC : 1649

BnaTT8C-b : ATAAGAGGAAGAACCAGGGAGATGGATGCATGATATATTGTGTTTGTATGTGAAGGTCAAAGAGAGTGAAGAGTTTGTGACCACATAAAGAGTTTC : 1649

BnaTT8C-y : ATAAGAGGAAGAACCAGGGAGATGGATGCATGATATATTGTGTTTGTATGTGAAGGTCAAAGAGAGTGAAGAGTTTGTGACCACATAAAGAGTTTC : 1649

BcaTT8C-b : ATAAGAGGAAGAACCAGGGAGATGGATGCATGATATATTGTGTTTGTATGTGAAGGTCAAAGAGAGTGAAGAGTTTGTGACCACATAAAGAGTTTC : 1649

BcaTT8C-y : ATAAGAGGAAGAACCAGGGAGATGGATGCATGATATATTGTGTTTGTATGTGAAGGTCAAAGAGAGTGAAGAGTTTGTGACCACATAAAGAGTTTC : 1649

1700

BolTT8C-b : TTCCACAACCTACCCGAAGTCAAACACTAAGCCTACTCTTTCTGAACACTTCATCAACGAAGAGCGTGAAGAAGACGAAGACGAAGTAGAAGAAGAAG : 1746

BolTT8C-y : TTCCACAACCTACCCGAAGTCAAACACTAAGCCTACTCTTTCTGAACACTTCATCAACGAAGAGCGTGAAGAAGACGAAGACGAAGTAGAAGAAGAAG : 1746

BnaTT8C-b : TTCCACAACCTACCCGAAGTCAAACACTAAGCCTACTCTTTCTGAACACTTCATCAACGAAGAGCGTGAAGAAGACGAAGACGAAGTAGAAGAAGAAG : 1746

BnaTT8C-y : TTCCACAACCTACCCGAAGTCAAACACTAAGCCTACTCTTTCTGAACACTTCATCAACGAAGAGCGTGAAGAAGACGAAGACGAAGTAGAAGAAGAAG : 1746

BcaTT8C-b : TTCCACAACCTACCCGAAGTCAAACACTAAGCCTACTCTTTCTGAACACTTCATCAACGAAGAGCGTGAAGAAGACGAAGACGAAGTAGAAGAAGAAG : 1746

BcaTT8C-y : TTCCACAACCTACCCGAAGTCAAACACTAAGCCTACTCTTTCTGAACACTTCATCAACGAAGAGCGTGAAGAAGACGAAGACGAAGTAGAAGAAGAAG : 1746

1800

BolTT8C-b : AAATGACAATGTCAGAGGAGATAAGACTTGGTTCTCCTGTATGACGATGACGCTCCAATCAAATCTACTCTCTGATTCCATATAGAAGCAACCAA : 1843

BolTT8C-y : AAATGACAATGTCAGAGGAGATAAGACTTGGTTCTCCTGTATGACGATGACGCTCCAATCAAATCTACTCTCTGATTCCATATAGAAGCAACCAA : 1843

BnaTT8C-b : AAATGACAATGTCAGAGGAGATAAGACTTGGTTCTCCTGTATGACGATGACGCTCCAATCAAATCTACTCTCTGATTCCATATAGAAGCAACCAA : 1843

BnaTT8C-y : AAATGACAATGTCAGAGGAGATAAGACTTGGTTCTCCTGTATGACGATGACGCTCCAATCAAATCTACTCTCTGATTCCATATAGAAGCAACCAA : 1843

BcaTT8C-b : AAATGACAATGTCAGAGGAGATAAGACTTGGTTCTCCTGTATGACGATGACGCTCCAATCAAATCTACTCTCTGATTCCATATAGAAGCAACCAA : 1843

BcaTT8C-y : AAATGACAATGTCAGAGGAGATAAGACTTGGTTCTCCTGTATGACGATGACGCTCCAATCAAATCTACTCTCTGATTCCATATAGAAGCAACCAA : 1843

1900

BolTT8C-b : TAGTTTAGGTATACCGTACACACCTTTCTTATTACATTAAATTAGTTAAACAATATCATTATAATAAAATTTCTAATAATAAAATATTTAAACTGGTT : 1940

BolTT8C-y : TAGTTTAGGTATACCGTACACACCTTTCTTATTACATTAAATTAGTTAAACAATATCATTATAATAAAATTTCTAATAATAAAATATTTAAACTGGTT : 1940

BnaTT8C-b : TAGTTTAGGTATACCGTACACACCTTTCTTATTACATTAAATTAGTTAAACAATATCATTATAATAAAATTTCTAATAATAAAATATTTAAACTGGTT : 1940

BnaTT8C-y : TAGTTTAGGTATACCGTACACACCTTTCTTATTACATTAAATTAGTTAAACAATATCATTATAATAAAATTTCTAATAATAAAATATTTAAACTGGTT : 1940

BcaTT8C-b : TAGTTTAGGTATACCGTACACACCTTTCTTATTACATTAAATTAGTTAAACAATATCATTATAATAAAATTTCTAATAATAAAATATTTAAACTGGTT : 1940

BcaTT8C-y : TAGTTTAGGTATACCGTACACACCTTTCTTATTACATTAAATTAGTTAAACAATATCATTATAATAAAATTTCTAATAATAAAATATTTAAACTGGTT : 1940

## 2000

CTCATGTCTGGTAATTCTAACATCTATCATTGTATATATAGATACACACATGGACATGATGAATCTAATGGAGGAAGGCGGAAATTATTCTCAGACA

GTATCAACACTTCTCATGTCACAACCCACCAGTCTTCTTTCAGATTCAGTTTCCACATCTTCTTACGTTCAATCATCGTTTATATCGTGGAGAGTTG

AGAATGTCAAAGAGCATCAGCAATATCAGCGAGTGGAAAAGCGGCGTCTTCGTCGTCGCAATGGATGCTCAAACACATAATCTTGAAAGTTCCTTT

CCTCCACGACAACACTAAAAATAAGAGGCTGCCGCGAGAAGAGCTTAACCATGTGGTGGCCGAGCGACGCAGAAGAGAGAAGCTAAATGAGAGATTC

ATAACGTTGAGATCATTGGTTCATTTGTGACCAAGATGGATAAAGTCTCGATCCTTGGAGACACCATTGAGTACGTAAACCATCTTTCTAAGAGGA

TCCATGAGCTGGAATCTACTCATCACGAGCCAAACCAAAGCGGATGCGTATCGGTAAGGGAAGAACTTGGGAAGAGGTGGAGGTTTCCATTATAGA

GAGCGATGTTTTGTTAGAGATGAGATGCGAGTACCGAGATGGTTTATTGCTCAACATTCTTCAGGTACTTAAGGAGCTAGGTATAGAGACCACTGCG

GTTCACACCGCCTTGAACGACCACCATTTTGAGGCAGAGATAAGGGCGAAAGTGAGAGGGAAGAAACCAACCATTGCTGAGGTTAAAAATAGCCATCC

ATCAAATCATATATAATAATAAACTCTAG
