# Supplementary material for: Metabolite Profiling and Transcriptome Analysis Provide Insight into Seed Coat Color in Brassica juncea
Source: MDPI journal article supplement (doi:10.3390/ijms22137215), 2021-07-05
Supplement: s1 [file s1]

## extron1

BniTT8B-b : ATGGATGAATCAAGTATTATACAGGTATGGAAGTGATCGGAGCTGAGGAAAAAGAGATTCAAGGGGCTACTTAAGGCGGTGGTACAATCTGTGGGGT : 97  
BcaTT8B-b : ATGGATGAATCAAGTATTATACAGGTATGGAAGTGATCGGAGCTGAGGAAAAAGAGATTCAAGGGGCTACTTAAGGCGGTGGTACAATCTGTGGGGT : 97  
BcaTT8B-y : ATGGATGAATCAAGTATTATACAGGTATGGAAGTGATCGGAGCTGAGGAAAAAGAGATTCAAGGGGCTACTTAAGGCGGTGGTACAATCTGTGGGGT : 97  
BjuTT8B-d : ATGGATGAATCAAGTATTATACAGGTATGGAAGTGATCGGAGCTGAGGAAAAAGAGATTCAAGGGGCTACTTAAGGCGGTGGTACAATCTGTGGGGT : 97  
BjuTT8B-y : ATGGATGAATCAAGTATTATACAGGTATGGAAGTGATCGGAGCTGAGGAAAAAGAGATTCAAGGGGCTACTTAAGGCGGTGGTACAATCTGTGGGGT : 97  
ATGGATGAATCAAGTATTATACAGGTATGGAAGTGATCGGAGCTGAGGAAAAAGAGATTCAAGGGGCTACTTAAGGCGGTGGTACAATCTGTGGGGT

100

BniTT8B-b : GGACTTATAGTCTCTTCTGGCAACTTTGTCTCAACGAAGGTTCTCTTTTCATTTCATCCATCTCTCACAATATATTTTATAATCCTTATCAATTATA : 194  
BcaTT8B-b : GGACTTATAGTCTCTTCTGGCAACTTTGTCTCAACGAAGGTTCTCTTTTCATTTCATCCATCTCTCACAATATATTTTATAATCCTTATCAATTATA : 194  
BcaTT8B-y : GGACTTATAGTCTCTTCTGGCAACTTTGTCTCAACGAAGGTTCTCTTTTCATTTCATCCATCTCTCACAATATATTTTATAATCCTTATCAATTATA : 194  
BjuTT8B-d : GGACTTATAGTCTCTTCTGGCAACTTTGTCTCAACGAAGGTTCTCTTTTCATTTCATCCATCTCTCACAATATATTTTATAATCCTTATCAATTATA : 194  
BjuTT8B-y : GGACTTATAGTCTCTTCTGGCAACTTTGTCTCAACGAAGGTTCTCTTTTCATTTCATCCATCTCTCACAATATATTTTATAATCCTTATCAATTATA : 194  
GGACTTATAGTCTCTTCTGGCAACTTTGTCTCAACGAAGGTTCTCTTTTCATTTCATCCATCTCTCACAATATATTTTATAATCCTTATCAATTATA

200

## extron2

BniTT8B-b : ATAAGTAGAAGTGACCAAAATGTTAAATCGATTAGGAAATTGGTGTGGAGTAGTGGATTCTACAACGGTGCAATAAAGACTAGAAAGACAACCTCAGCC : 291  
BcaTT8B-b : ATAAGTAGAAGTGACCAAAATGTTAAATCGATTAGGAAATTGGTGTGGAGTAGTGGATTCTACAACGGTGCAATAAAGACTAGAAAGACAACCTCAGCC : 291  
BcaTT8B-y : ATAAGTAGAAGTGACCAAAATGTTAAATCGATTAGGAAATTGGTGTGGAGTAGTGGATTCTACAACGGTGCAATAAAGACTAGAAAGACAACCTCAGCC : 291  
BjuTT8B-d : ATAAGTAGAAGTGACCAAAATGTTAAATCGATTAGGAAATTGGTGTGGAGTAGTGGATTCTACAACGGTGCAATAAAGACTAGAAAGACAACCTCAGCC : 291  
BjuTT8B-y : ATAAGTAGAAGTGACCAAAATGTTAAATCGATTAGGAAATTGGTGTGGAGTAGTGGATTCTACAACGGTGCAATAAAGACTAGAAAGACAACCTCAGCC : 291  
ATAAGTAGAAGTGACCAAAATGTTAAATCGATTAGGAAATTGGTGTGGAGTAGTGGATTCTACAACGGTGCAATAAAGACTAGAAAGACAACCTCAGCC

300

BniTT8B-b : GGCGGAAGTTACGGCTGAAGAGGCTGCGTTGGAGAGAAGCCCAACAGCTCATGGAGCTTTACCAGACGCTTTTTTCCGGAGAATCATCGATGGAAGCG : 388  
BcaTT8B-b : GGCGGAAGTTACGGCTGAAGAGGCTGCGTTGGAGAGAAGCCCAACAGCTCATGGAGCTTTACCAGACGCTTTTTTCCGGAGAATCATCGATGGAAGCG : 388  
BcaTT8B-y : GGCGGAAGTTACGGCTGAAGAGGCTGCGTTGGAGAGAAGCCCAACAGCTCATGGAGCTTTACCAGACGCTTTTTTCCGGAGAATCATCGATGGAAGCG : 388  
BjuTT8B-d : GGCGGAAGTTACGGCTGAAGAGGCTGCGTTGGAGAGAAGCCCAACAGCTCATGGAGCTTTACCAGACGCTTTTTTCCGGAGAATCATCGATGGAAGCG : 388  
BjuTT8B-y : GGCGGAAGTTACGGCTGAAGAGGCTGCGTTGGAGAGAAGCCCAACAGCTCATGGAGCTTTACCAGACGCTTTTTTCCGGAGAATCATCGATGGAAGCG : 388  
GGCGGAAGTTACGGCTGAAGAGGCTGCGTTGGAGAGAAGCCCAACAGCTCATGGAGCTTTACCAGACGCTTTTTTCCGGAGAATCATCGATGGAAGCG

400

BniTT8B-b : AGGGCTTGACACGACTGTGCGCGGAGGATTTGACGGACACTGAGTGGTTTTATGTGCTGTGTTTCACTTACTCTTTTGAACCTCCTTCTGGGTACA : 485  
BcaTT8B-b : AGGGCTTGACACGACTGTGCGCGGAGGATTTGACGGACACTGAGTGGTTTTATGTGCTGTGTTTCACTTACTCTTTTGAACCTCCTTCTGGGTACA : 485  
BcaTT8B-y : AGGGCTTGACACGACTGTGCGCGGAGGATTTGACGGACACTGAGTGGTTTTATGTGCTGTGTTTCACTTACTCTTTTGAACCTCCTTCTGGGTACA : 485  
BjuTT8B-d : AGGGCTTGACACGACTGTGCGCGGAGGATTTGACGGACACTGAGTGGTTTTATGTGCTGTGTTTCACTTACTCTTTTGAACCTCCTTCTGGGTACA : 485  
BjuTT8B-y : AGGGCTTGACACGACTGTGCGCGGAGGATTTGACGGACACTGAGTGGTTTTATGTGCTGTGTTTCACTTACTCTTTTGAACCTCCTTCTGGGTACA : 485  
AGGGCTTGACACGACTGTGCGCGGAGGATTTGACGGACACTGAGTGGTTTTATGTGCTGTGTTTCACTTACTCTTTTGAACCTCCTTCTGGGTACA

500

BniTT8B-b : ACAACTCTCTCTCTCTATCTCTTCAAAGTTTTTTTTTCTTTTCAAAAAGACTACTCAGAGTTTCTTAATTTGTCTTTTTTCATCTTCTCTTAGTGAA : 582  
BcaTT8B-b : ACAACTCTCTCTCTCTATCTCTTCAAAGTTTTTTTTTCTTTTCAAAAAGACTACTCAGAGTTTCTTAATTTGTCTTTTTTCATCTTCTCTTAGTGAA : 582  
BcaTT8B-y : ACAACTCTCTCTCTCTATCTCTTCAAAGTTTTTTTTTCTTTTCAAAAAGACTACTCAGAGTTTCTTAATTTGTCTTTTTTCATCTTCTCTTAGTGAA : 582  
BjuTT8B-d : ACAACTCTCTCTCTCTATCTCTTCAAAGTTTTTTTTTCTTTTCAAAAAGACTACTCAGAGTTTCTTAATTTGTCTTTTTTCATCTTCTCTTAGTGAA : 582  
BjuTT8B-y : ACAACTCTCTCTCTCTATCTCTTCAAAGTTTTTTTTTCTTTTCAAAAAGACTACTCAGAGTTTCTTAATTTGTCTTTTTTCATCTTCTCTTAGTGAA : 582  
ACAACTCTCTCTCTCTATCTCTTCAAAGTTTTTTTTTCTTTTCAAAAAGACTACTCAGAGTTTCTTAATTTGTCTTTTTTCATCTTCTCTTAGTGAA

600

BniTT8B-b : GACAAAAATAGCATTGTGTGTTAAATGCGAATCACAAATACTATGGAAGCATTAAAGACAACTGGGGAGTTTAAAGTTACTGAAAGAAGAAATGTAT : 679  
BcaTT8B-b : GACAAAAATAGCATTGTGTGTTAAATGCGAATCACAAATACTATGGAAGCATTAAAGACAACTGGGGAGTTTAAAGTTACTGAAAGAAGAAATGTAT : 679  
BcaTT8B-y : GACAAAAATAGCATTGTGTGTTAAATGCGAATCACAAATACTATGGAAGCATTAAAGACAACTGGGGAGTTTAAAGTTACTGAAAGAAGAAATGTAT : 679  
BjuTT8B-d : GACAAAAATAGCATTGTGTGTTAAATGCGAATCACAAATACTATGGAAGCATTAAAGACAACTGGGGAGTTTAAAGTTACTGAAAGAAGAAATGTAT : 679  
BjuTT8B-y : GACAAAAATAGCATTGTGTGTTAAATGCGAATCACAAATACTATGGAAGCATTAAAGACAACTGGGGAGTTTAAAGTTACTGAAAGAAGAAATGTAT : 679  
GACAAAAATAGCATTGTGTGTTAAATGCGAATCACAAATACTATGGAAGCATTAAAGACAACTGGGGAGTTTAAAGTTACTGAAAGAAGAAATGTAT

700

BniTT8B-b : TAAAGTTTGTGAAAACGTACACTTCATTTTGGTGAACATATCTGGACCGTTGAGATGATCTTATTGGTTTGTTTATTGATTATCTAAAGTAGAAGCA : 776  
BcaTT8B-b : TAAAGTTTGTGAAAACGTACACTTCATTTTGGTGAACATATCTGGACCGTTGAGATGATCTTATTGGTTTGTTTATTGATTATCTAAAGTAGAAGCA : 776  
BcaTT8B-y : TAAAGTTTGTGAAAACGTACACTTCATTTTGGTGAACATATCTGGACCGTTGAGATGATCTTATTGGTTTGTTTATTGATTATCTAAAGTAGAAGCA : 776  
BjuTT8B-d : TAAAGTTTGTGAAAACGTACACTTCATTTTGGTGAACATATCTGGACCGTTGAGATGATCTTATTGGTTTGTTTATTGATTATCTAAAGTAGAAGCA : 776  
BjuTT8B-y : TAAAGTTTGTGAAAACGTACACTTCATTTTGGTGAACATATCTGGACCGTTGAGATGATCTTATTGGTTTGTTTATTGATTATCTAAAGTAGAAGCA : 776  
TAAAGTTTGTGAAAACGTACACTTCATTTTGGTGAACATATCTGGACCGTTGAGATGATCTTATTGGTTTGTTTATTGATTATCTAAAGTAGAAGCA

800

BniTT8B-b : TAGATGATAAATGCATAACAAAGTGTTAGTTATCGGTATAATTAATGTTTTTCTCTATGGAGGAAAAAAATCAAAATATAAATGTGGAAGTATT : 873  
BcaTT8B-b : TAGATGATAAATGCATAACAAAGTGTTAGTTATCGGTATAATTAATGTTTTTCTCTATGGAGGAAAAAAATCAAAATATAAATGTGGAAGTATT : 873  
BcaTT8B-y : TAGATGATAAATGCATAACAAAGTGTTAGTTATCGGTATAATTAATGTTTTTCTCTATGGAGGAAAAAAATCAAAATATAAATGTGGAAGTATT : 873  
BjuTT8B-d : TAGATGATAAATGCATAACAAAGTGTTAGTTATCGGTATAATTAATGTTTTTCTCTATGGAGGAAAAAAATCAAAATATAAATGTGGAAGTATT : 873  
BjuTT8B-y : TAGATGATAAATGCATAACAAAGTGTTAGTTATCGGTATAATTAATGTTTTTCTCTATGGAGGAAAAAAATCAAAATATAAATGTGGAAGTATT : 873  
TAGATGATAAATGCATAACAAAGTGTTAGTTATCGGTATAATTAATGTTTTTCTCTATGGAGGAAAAAAATCAAAATATAAATGTGGAAGTATT

## extron3

900

BniTT8B-b : AATTTGTAGGATGCCAGGAAAGGCGTATGCCAGGAGGAAGCAGTATGGATAAGTGGTGCAAAATGAGGTTGACAGTAAATCTTCTCTAGGGCTATT : 970  
BcaTT8B-b : AATTTGTAGGATGCCAGGAAAGGCGTATGCCAGGAGGAAGCAGTATGGATAAGTGGTGCAAAATGAGGTTGACAGTAAATCTTCTCTAGGGCTATT : 970  
BcaTT8B-y : AATTTGTAGGATGCCAGGAAAGGCGTATGCCAGGAGGAAGCAGTATGGATAAGTGGTGCAAAATGAGGTTGACAGTAAATCTTCTCTAGGGCTATT : 970  
BjuTT8B-d : AATTTGTAGGATGCCAGGAAAGGCGTATGCCAGGAGGAAGCAGTATGGATAAGTGGTGCAAAATGAGGTTGACAGTAAATCTTCTCTAGGGCTATT : 970  
BjuTT8B-y : AATTTGTAGGATGCCAGGAAAGGCGTATGCCAGGAGGAAGCAGTATGGATAAGTGGTGCAAAATGAGGTTGACAGTAAATCTTCTCTAGGGCTATT : 970  
AATTTGTAGGATGCCAGGAAAGGCGTATGCCAGGAGGAAGCAGTATGGATAAGTGGTGCAAAATGAGGTTGACAGTAAATCTTCTCTAGGGCTATT

1000

BniTT8B-b : TCTGCAAAGGTTTATTTCCCTTTTATTCATTACCACTACACTGTGTATTTACTTGTACTTATTTAGATATACGCAATTTTATATATCTCATTCTTCA : 1067  
BcaTT8B-b : TCTGCAAAGGTTTATTTCCCTTTTATTCATTACCACTACACTGTGTATTTACTTGTACTTATTTAGATATACGCAATTTTATATATCTCATTCTTCA : 1067  
BcaTT8B-y : TCTGCAAAGGTTTATTTCCCTTTTATTCATTACCACTACACTGTGTATTTACTTGTACTTATTTAGATATACGCAATTTTATATATCTCATTCTTCA : 1067  
BjuTT8B-d : TCTGCAAAGGTTTATTTCCCTTTTATTCATTACCACTACACTGTGTATTTACTTGTACTTATTTAGATATACGCAATTTTATATATCTCATTCTTCA : 1067  
BjuTT8B-y : TCTGCAAAGGTTTATTTCCCTTTTATTCATTACCACTACACTGTGTATTTACTTGTACTTATTTAGATATACGCAATTTTATATATCTCATTCTTCA : 1067  
TCTGCAAAGGTTTATTTCCCTTTTATTCATTACCACTACACTGTGTATTTACTTGTACTTATTTAGATATACGCAATTTTATATATCTCATTCTTCA

|           |   | 1100                                                                                                 | ext ron4 | *       |          |
|-----------|---|------------------------------------------------------------------------------------------------------|----------|---------|----------|
| BniTT8B-b | : | AACTAATTAATTTATCTTCTTTACTTGAATGCTCTTTCTACATTAGAGTGCCAAAATTCAGGTAATGTTGCCGTTATTAATTGATTATTTTCAT       |          |         | : 1164   |
| BcaTT8B-b | : | AACTAATTAATTTATCTTCTTTACTTGAATGCTCTTTCTACATTAGAGTGCCAAAATTCAGGTAATGTTGCCGTTATTAATTGATTATTTTCAT       |          |         | : 1164   |
| BcaTT8B-y | : | AACTAATTAATTTATCTTCTTTACTTGAATGCTCTTTCTACATTAGAGTGCCAAAATTCAGGTAATGTTGCCGTTATTAATTGATTATTTTCAT       |          |         | : 1164   |
| BjuTT8B-d | : | AACTAATTAATTTATCTTCTTTACTTGAATGCTCTTTCTACATTAGAGTGCCAAAATTCAGGTAATGTTGCCGTTATTAATTGATTATTTTCAT       |          |         | : 1164   |
| BjuTT8B-y | : | AACTAATTAATTTATCTTCTTTACTTGAATGCTCTTTCTACATTAGAGTGCCAAAATTCAGGTAATGTTGCCGTTATTAATTGATTATTTTCAT       |          |         | : 1164   |
|           |   | AACTAATTAATTTATCTTCTTTACTTGAATGCTCTTTCTACATTAGAGTGCCAAAATTCAGGTAATGTTGCCGTTATTAATTGATTATTTTCAT       |          |         |          |
|           |   | 1200                                                                                                 |          | *       | ext ron5 |
| BniTT8B-b | : | TTTCGTAGAAAAGGTAATCAATTAATAAAGTTATTTTACATATTTTGAGAATTGTTTTGTGATGAAAAACAATAAAAAACAGACAATGGTTTGCA      |          |         | : 1261   |
| BcaTT8B-b | : | TTTCGTAGAAAAGGTAATCAATTAATAAAGTTATTTTACATATTTTGAGAATTGTTTTGTGATGAAAAACAATAAAAAACAGACAATGGTTTGCA      |          |         | : 1261   |
| BcaTT8B-y | : | TTTCGTAGAAAAGGTAATCAATTAATAAAGTTATTTTACATATTTTGAGAATTGTTTTGTGATGAAAAACAATAAAAAACAGACAATGGTTTGCA      |          |         | : 1261   |
| BjuTT8B-d | : | TTTCGTAGAAAAGGTAATCAATTAATAAAGTTATTTTACATATTTTGAGAATTGTTTTGTGATGAAAAACAATAAAAAACAGACAATGGTTTGCA      |          |         | : 1261   |
| BjuTT8B-y | : | TTTCGTAGAAAAGGTAATCAATTAATAAAGTTATTTTACATATTTTGAGAATTGTTTTGTGATGAAAAACAATAAAAAACAGACAATGGTTTGCA      |          |         | : 1261   |
|           |   | TTTCGTAGAAAAGGTAATCAATTAATAAAGTTATTTTACATATTTTGAGAATTGTTTTGTGATGAAAAACAATAAAAAACAGACAATGGTTTGCA      |          |         |          |
|           |   | 1300                                                                                                 |          | *       |          |
| BniTT8B-b | : | TTCCCGTGCTTGATGGCGTTTTGGAACTCGGCACAACGAACAAGGTAATTCCTCTATTTATGTCGGTACAAAAATGTACACGAGTACATCCAGCTCG    |          |         | : 1358   |
| BcaTT8B-b | : | TTCCCGTGCTTGATGGCGTTTTGGAACTCGGCACAACGAACAAGGTAATTCCTCTATTTATGTCGGTACAAAAATGTACACGAGTACATCCAGCTCG    |          |         | : 1358   |
| BcaTT8B-y | : | TTCCCGTGCTTGATGGCGTTTTGGAACTCGGCACAACGAACAAGGTAATTCCTCTATTTATGTCGGTACAAAAATGTACACGAGTACATCCAGCTCG    |          |         | : 1358   |
| BjuTT8B-d | : | TTCCCGTGCTTGATGGCGTTTTGGAACTCGGCACAACGAACAAGGTAATTCCTCTATTTATGTCGGTACAAAAATGTACACGAGTACATCCAGCTCG    |          |         | : 1358   |
| BjuTT8B-y | : | TTCCCGTGCTTGATGGCGTTTTGGAACTCGGCACAACGAACAAGGTAATTCCTCTATTTATGTCGGTACAAAAATGTACACGAGTACATCCAGCTCG    |          |         | : 1358   |
|           |   | TTCCCGTGCTTGATGGCGTTTTGGAACTCGGCACAACGAACAAGGTAATTCCTCTATTTATGTCGGTACAAAAATGTACACGAGTACATCCAGCTCG    |          |         |          |
|           |   | 1400                                                                                                 |          | *       |          |
| BniTT8B-b | : | TTCTATATTACTTCGACAAATAAAGAAAAATAATATACAGACACATCAACCATTTCGCAGTCATATGATAAAAAATATAGTTATTTTCATACATTATA   |          |         | : 1455   |
| BcaTT8B-b | : | TTCTATATTACTTCGACAAATAAAGAAAAATAATATACAGACACATCAACCATTTCGCAGTCATATGATAAAAAATATAGTTATTTTCATACATTATA   |          |         | : 1455   |
| BcaTT8B-y | : | TTCTATATTACTTCGACAAATAAAGAAAAATAATATACAGACACATCAACCATTTCGCAGTCATATGATAAAAAATATAGTTATTTTCATACATTATA   |          |         | : 1455   |
| BjuTT8B-d | : | TTCTATATTACTTCGACAAATAAAGAAAAATAATATACAGACACATCAACCATTTCGCAGTCATATGATAAAAAATATAGTTATTTTCATACATTATA   |          |         | : 1453   |
| BjuTT8B-y | : | TTCTATATTACTTCGACAAATAAAGAAAAATAATATACAGACACATCAACCATTTCGCAGTCATATGATAAAAAATATAGTTATTTTCATACATTATA   |          |         | : 1453   |
|           |   | TTCTATATTACTTCGACAAATAAAGAAAAATAATATACAGACACATCAACCATTTCGCAGTCATATGATAAAAAATATAGTTATTTTCATACATTATA   |          |         |          |
|           |   | 1500                                                                                                 |          | *       | ext ron6 |
| BniTT8B-b | : | TACACAAGCAAAATGATGTCAAAATACACAACCTAATGAAAAATATGCGTGATATGTTGTGTTTTATATGTGAAGGTCAAAGAAAGTGAAGAGTTTGTT  |          |         | : 1552   |
| BcaTT8B-b | : | TACACAAGCAAAATGATGTCAAAATACACAACCTAATGAAAAATATGCGTGATATGTTGTGTTTTATATGTGAAGGTCAAAGAAAGTGAAGAGTTTGTT  |          |         | : 1552   |
| BcaTT8B-y | : | TACACAAGCAAAATGATGTCAAAATACACAACCTAATGAAAAATATGCGTGATATGTTGTGTTTTATATGTGAAGGTCAAAGAAAGTGAAGAGTTTGTT  |          |         | : 1552   |
| BjuTT8B-d | : | TACACAAGCAAAATGATGTCAAAATACACAACCTAATGAAAAATATGCGTGATATGTTGTGTTTTATATGTGAAGGTCAAAGAAAGTGAAGAGTTTGTT  |          |         | : 1550   |
| BjuTT8B-y | : | TACACAAGCAAAATGATGTCAAAATACACAACCTAATGAAAAATATGCGTGATATGTTGTGTTTTATATGTGAAGGTCAAAGAAAGTGAAGAGTTTGTT  |          |         | : 1550   |
|           |   | TACACAAGCAAAATGATGTCAAAATACACAACCTAATGAAAAATATGCGTGATATGTTGTGTTTTATATGTGAAGGTCAAAGAAAGTGAAGAGTTTGTT  |          |         |          |
|           |   | 1600                                                                                                 |          |         |          |
| BniTT8B-b | : | GAGCACATAAAGAGTTTCTTCCACAACCACCCGAAGTCAAACACTAAGCCTGCTCTTTTTGAACACTCAATCAACGAAGAGCATGAAGAAGTAGAAG    |          |         | : 1649   |
| BcaTT8B-b | : | GAGCACATAAAGAGTTTCTTCCACAACCACCCGAAGTCAAACACTAAGCCTGCTCTTTTTGAACACTCAATCAACGAAGAGCATGAAGAAGTAGAAG    |          |         | : 1649   |
| BcaTT8B-y | : | GAGCACATAAAGAGTTTCTTCCACAACCACCCGAAGTCAAACACTAAGCCTGCTCTTTTTGAACACTCAATCAACGAAGAGCATGAAGAAGTAGAAG    |          |         | : 1649   |
| BjuTT8B-d | : | GAGCACATAAAGAGTTTCTTCCACAACCACCCGAAGTCAAACACTAAGCCTGCTCTTTTTGAACACTCAATCAACGAAGAGCATGAAGAAGTAGAAG    |          |         | : 1647   |
| BjuTT8B-y | : | GAGCACATAAAGAGTTTCTTCCACAACCACCCGAAGTCAAACACTAAGCCTGCTCTTTTTGAACACTCAATCAACGAAGAGCATGAAGAAGTAGAAG    |          |         | : 1647   |
|           |   | GAGCACATAAAGAGTTTCTTCCACAACCACCCGAAGTCAAACACTAAGCCTGCTCTTTTTGAACACTCAATCAACGAAGAGCATGAAGAAGTAGAAG    |          |         |          |
|           |   | *                                                                                                    | 1700     |         |          |
| BniTT8B-b | : | AAGAAGAAATGACAATGTCAGAGGAGATAAGACTTGGTTCTCCTGATGACGATGACGCTCCTCAATCAAAATCTAATCTCTGATTTTCATATAGAAGC   |          |         | : 1746   |
| BcaTT8B-b | : | AAGAAGAAATGACAATGTCAGAGGAGATAAGACTTGGTTCTCCTGATGACGATGACGCTCCTCAATCAAAATCTAATCTCTGATTTTCATATAGAAGC   |          |         | : 1746   |
| BcaTT8B-y | : | AAGAAGAAATGACAATGTCAGAGGAGATAAGACTTGGTTCTCCTGATGACGATGACGCTCCTCAATCAAAATCTAATCTCTGATTTTCATATAGAAGC   |          |         | : 1746   |
| BjuTT8B-d | : | AAGAAGAAATGACAATGTCAGAGGAGATAAGACTTGGTTCTCCTGATGACGATGACGCTCCTCAATCAAAATCTAATCTCTGATTTTCATATAGAAGC   |          |         | : 1744   |
| BjuTT8B-y | : | AAGAAGAAATGACAATGTCAGAGGAGATAAGACTTGGTTCTCCTGATGACGATGACGCTCCTCAATCAAAATCTAATCTCTGATTTTCATATAGAAGC   |          |         | : 1744   |
|           |   | AAGAAGAAATGACAATGTCAGAGGAGATAAGACTTGGTTCTCCTGATGACGATGACGCTCCTCAATCAAAATCTAATCTCTGATTTTCATATAGAAGC   |          |         |          |
|           |   | *                                                                                                    | 1800     |         |          |
| BniTT8B-b | : | AACCAATAGTTTAGGTATACCGTACACCTTTCTTATTACGTTAAATTAGAATAACATTTTAATTAATTTTCTAATAATATATTTTTAAATCTGCTCT    |          |         | : 1843   |
| BcaTT8B-b | : | AACCAATAGTTTAGGTATACCGTACACCTTTCTTATTACGTTAAATTAGAATAACATTTTAATTAATTTTCTAATAATATATTTTTAAATCTGCTCT    |          |         | : 1843   |
| BcaTT8B-y | : | AACCAATAGTTTAGGTATACCGTACACCTTTCTTATTACGTTAAATTAGAATAACATTTTAATTAATTTTCTAATAATATATTTTTAAATCTGCTCT    |          |         | : 1843   |
| BjuTT8B-d | : | AACCAATAGTTTAGGTATACCGTACACCTTTCTTATTACGTTAAATTAGAATAACATTTTAATTAATTTTCTAATAATATATTTTTAAATCTGCTCT    |          |         | : 1841   |
| BjuTT8B-y | : | AACCAATAGTTTAGGTATACCGTACACCTTTCTTATTACGTTAAATTAGAATAACATTTTAATTAATTTTCTAATAATATATTTTTAAATCTGCTCT    |          |         | : 1841   |
|           |   | AACCAATAGTTTAGGTATACCGTACACCTTTCTTATTACGTTAAATTAGAATAACATTTTAATTAATTTTCTAATAATATATTTTTAAATCTGCTCT    |          |         |          |
|           |   | *                                                                                                    | 1900     |         |          |
| BniTT8B-b | : | CTGATTTCCATATAGAAGCAACCAATAGTGTAGGTATACCGTGCACCTTTCCCTGTTACATTAAATTAGTTAACAATATCATTATAATTAATTTCCCTA  |          |         | : 1940   |
| BcaTT8B-b | : | CTGATTTCCATATAGAAGCAACCAATAGTGTAGGTATACCGTGCACCTTTCCCTGTTACATTAAATTAGTTAACAATATCATTATAATTAATTTCCCTA  |          |         | : 1940   |
| BcaTT8B-y | : | CTGATTTCCATATAGAAGCAACCAATAGTGTAGGTATACCGTGCACCTTTCCCTGTTACATTAAATTAGTTAACAATATCATTATAATTAATTTCCCTA  |          |         | : 1940   |
| BjuTT8B-d | : | CTGATTTCCATATAGAAGCAACCAATAGTGTAGGTATACCGTGCACCTTTCCCTGTTACATTAAATTAGTTAACAATATCATTATAATTAATTTCCCTA  |          |         | : 1938   |
| BjuTT8B-y | : | CTGATTTCCATATAGAAGCAACCAATAGTGTAGGTATACCGTGCACCTTTCCCTGTTACATTAAATTAGTTAACAATATCATTATAATTAATTTCCCTA  |          |         | : 1938   |
|           |   | CTGATTTCCATATAGAAGCAACCAATAGTGTAGGTATACCGTGCACCTTTCCCTGTTACATTAAATTAGTTAACAATATCATTATAATTAATTTCCCTA  |          |         |          |
|           |   | *                                                                                                    | 2000     | extron7 |          |
| BniTT8B-b | : | ACAATATAGATTTTTAAGTGTTTCTCATGTCTGGTAATTCTAACATCTATCATTTGTATATATAGATACACATATGGACATGATGAATCTAATGGAGG   |          |         | : 2037   |
| BcaTT8B-b | : | ACAATATAGATTTTTAAGTGTTTCTCATGTCTGGTAATTCTAACATCTATCATTTGTATATATAGATACACATATGGACATGATGAATCTAATGGAGG   |          |         | : 2037   |
| BcaTT8B-y | : | ACAATATAGATTTTTAAGTGTTTCTCATGTCTGGTAATTCTAACATCTATCATTTGTATATATAGATACACATATGGACATGATGAATCTAATGGAGG   |          |         | : 2037   |
| BjuTT8B-d | : | ACAATATAGATTTTTAAGTGTTTCTCATGTCTGGTAATTCTAACATCTATCATTTGTATATATAGATACACATATGGACATGATGAATCTAATGGAGG   |          |         | : 2035   |
| BjuTT8B-y | : | ACAATATAGATTTTTAAGTGTTTCTCATGTCTGGTAATTCTAACATCTATCATTTGTATATATAGATACACATATGGACATGATGAATCTAATGGAGG   |          |         | : 2035   |
|           |   | ACAATATAGATTTTTAAGTGTTTCTCATGTCTGGTAATTCTAACATCTATCATTTGTATATATAGATACACATATGGACATGATGAATCTAATGGAGG   |          |         |          |
|           |   | *                                                                                                    | 2100     |         |          |
| BniTT8B-b | : | AAGGCGGAAAAATTTCTCAGACAGTATCAACACTTCTCATGTGCACAACCCACCAGTCTTCTTTTCAGATTTCAGTTTCCACATCTTCTTACGTTCAATC |          |         | : 2134   |
| BcaTT8B-b | : | AAGGCGGAAAAATTTCTCAGACAGTATCAACACTTCTCATGTGCACAACCCACCAGTCTTCTTTTCAGATTTCAGTTTCCACATCTTCTTACGTTCAATC |          |         | : 2134   |
| BcaTT8B-y | : | AAGGCGGAAAAATTTCTCAGACAGTATCAACACTTCTCATGTGCACAACCCACCAGTCTTCTTTTCAGATTTCAGTTTCCACATCTTCTTACGTTCAATC |          |         | : 2134   |
| BjuTT8B-d | : | AAGGCGGAAAAATTTCTCAGACAGTATCAACACTTCTCATGTGCACAACCCACCAGTCTTCTTTTCAGATTTCAGTTTCCACATCTTCTTACGTTCAATC |          |         | : 2132   |
| BjuTT8B-y | : | AAGGCGGAAAAATTTCTCAGACAGTATCAACACTTCTCATGTGCACAACCCACCAGTCTTCTTTTCAGATTTCAGTTTCCACATCTTCTTACGTTCAATC |          |         | : 2132   |
|           |   | AAGGCGGAAAAATTTCTCAGACAGTATCAACACTTCTCATGTGCACAACCCACCAGTCTTCTTTTCAGATTTCAGTTTCCACATCTTCTTACGTTCAATC |          |         |          |

\* 2200

BniTT8B-b : ATCGTTTGTCTCGTGGAGAGTTGAGAAATGTCAAAGAGCATCAGCAATATCAGCGAGTGGAGAAAGCGTCGTCGTCGTCCTCAATGGATGCTCAAA : 2231  
 BcaTT8B-b : ATCGTTTGTCTCGTGGAGAGTTGAGAAATGTCAAAGAGCATCAGCAATATCAGCGAGTGGAGAAAGCGTCGTCGTCGTCCTCAATGGATGCTCAAA : 2231  
 BcaTT8B-y : ATCGTTTGTCTCGTGGAGAGTTGAGAAATGTCAAAGAGCATCAGCAATATCAGCGAGTGGAGAAAGCGTCGTCGTCGTCCTCAATGGATGCTCAAA : 2231  
 BjuTT8B-d : ATCGTTTGTCTCGTGGAGAGTTGAGAAATGTCAAAGAGCATCAGCAATATCAGCGAGTGGAGAAAGCGTCGTCGTCGTCCTCAATGGATGCTCAAA : 2229  
 BjuTT8B-y : ATCGTTTGTCTCGTGGAGAGTTGAGAAATGTCAAAGAGCATCAGCAATATCAGCGAGTGGAGAAAGCGTCGTCGTCGTCCTCAATGGATGCTCAAA : 2229  
 ATCGTTTGTCTCGTGGAGAGTTGAGAAATGTCAAAGAGCATCAGCAATATCAGCGAGTGGAGAAAGCGTCGTCGTCGTCCTCAATGGATGCTCAAA

\* 2300

BniTT8B-b : CACATAATCTTGAGAGTTCCTTTCCCTCCACGACAACACTAAAAATAAGAAGCTACCGCGGGAAGAGCTTAACCATGTGGTGGCTGAGCGACGCAGAA : 2328  
 BcaTT8B-b : CACATAATCTTGAGAGTTCCTTTCCCTCCACGACAACACTAAAAATAAGAAGCTACCGCGGGAAGAGCTTAACCATGTGGTGGCTGAGCGACGCAGAA : 2328  
 BcaTT8B-y : CACATAATCTTGAGAGTTCCTTTCCCTCCACGACAACACTAAAAATAAGAAGCTACCGCGGGAAGAGCTTAACCATGTGGTGGCTGAGCGACGCAGAA : 2328  
 BjuTT8B-d : CACATAATCTTGAGAGTTCCTTTCCCTCCACGACAACACTAAAAATAAGAAGCTACCGCGGGAAGAGCTTAACCATGTGGTGGCTGAGCGACGCAGAA : 2326  
 BjuTT8B-y : CACATAATCTTGAGAGTTCCTTTCCCTCCACGACAACACTAAAAATAAGAAGCTACCGCGGGAAGAGCTTAACCATGTGGTGGCTGAGCGACGCAGAA : 2326  
 CACATAATCTTGAGAGTTCCTTTCCCTCCACGACAACACTAAAAATAAGAAGCTACCGCGGGAAGAGCTTAACCATGTGGTGGCTGAGCGACGCAGAA

\* 2400

BniTT8B-b : GAGAGAAGCTAAACGAGAGATTCATAACGTTGAGATCATTGGTTCCATTGTGTGACCAAGATGGATAAAGTCTCAATCCTTGGAGACACCATTTCAGTA : 2425  
 BcaTT8B-b : GAGAGAAGCTAAACGAGAGATTCATAACGTTGAGATCATTGGTTCCATTGTGTGACCAAGATGGATAAAGTCTCAATCCTTGGAGACACCATTTCAGTA : 2425  
 BcaTT8B-y : GAGAGAAGCTAAACGAGAGATTCATAACGTTGAGATCATTGGTTCCATTGTGTGACCAAGATGGATAAAGTCTCAATCCTTGGAGACACCATTTCAGTA : 2425  
 BjuTT8B-d : GAGAGAAGCTAAACGAGAGATTCATAACGTTGAGATCATTGGTTCCATTGTGTGACCAAGATGGATAAAGTCTCAATCCTTGGAGACACCATTTCAGTA : 2423  
 BjuTT8B-y : GAGAGAAGCTAAACGAGAGATTCATAACGTTGAGATCATTGGTTCCATTGTGTGACCAAGATGGATAAAGTCTCAATCCTTGGAGACACCATTTCAGTA : 2423  
 GAGAGAAGCTAAACGAGAGATTCATAACGTTGAGATCATTGGTTCCATTGTGTGACCAAGATGGATAAAGTCTCAATCCTTGGAGACACCATTTCAGTA

\* 2500

BniTT8B-b : CGTAAACCATCTTTGTAAGAGGATCCATGAGCTAGAATCTACTCATCACGAGCCAGCACATAAGCGGATGCGTATCGGTAAAGGGAAGAACTTGGGAA : 2522  
 BcaTT8B-b : CGTAAACCATCTTTGTAAGAGGATCCATGAGCTAGAATCTACTCATCACGAGCCAGCACATAAGCGGATGCGTATCGGTAAAGGGAAGAACTTGGGAA : 2522  
 BcaTT8B-y : CGTAAACCATCTTTGTAAGAGGATCCATGAGCTAGAATCTACTCATCACGAGCCAGCACATAAGCGGATGCGTATCGGTAAAGGGAAGAACTTGGGAA : 2522  
 BjuTT8B-d : CGTAAACCATCTTTGTAAGAGGATCCATGAGCTAGAATCTACTCATCACGAGCCAGCACATAAGCGGATGCGTATCGGTAAAGGGAAGAACTTGGGAA : 2520  
 BjuTT8B-y : CGTAAACCATCTTTGTAAGAGGATCCATGAGCTAGAATCTACTCATCACGAGCCAGCACATAAGCGGATGCGTATCGGTAAAGGGAAGAACTTGGGAA : 2520  
 CGTAAACCATCTTTGTAAGAGGATCCATGAGCTAGAATCTACTCATCACGAGCCAGCACATAAGCGGATGCGTATCGGTAAAGGGAAGAACTTGGGAA

\* 2600

BniTT8B-b : GAGGTGGAGGTTTCCATTATAGAGAGCGATGTTTTATTAGAGATGAGATGCGTGTACCGAGATGGTTTTATTGCTCGACATTCTTCAGGTACTTAAGG : 2619  
 BcaTT8B-b : GAGGTGGAGGTTTCCATTATAGAGAGCGATGTTTTATTAGAGATGAGATGCGTGTACCGAGATGGTTTTATTGCTCGACATTCTTCAGGTACTTAAGG : 2619  
 BcaTT8B-y : GAGGTGGAGGTTTCCATTATAGAGAGCGATGTTTTATTAGAGATGAGATGCGTGTACCGAGATGGTTTTATTGCTCGACATTCTTCAGGTACTTAAGG : 2619  
 BjuTT8B-d : GAGGTGGAGGTTTCCATTATAGAGAGCGATGTTTTATTAGAGATGAGATGCGTGTACCGAGATGGTTTTATTGCTCGACATTCTTCAGGTACTTAAGG : 2617  
 BjuTT8B-y : GAGGTGGAGGTTTCCATTATAGAGAGCGATGTTTTATTAGAGATGAGATGCGTGTACCGAGATGGTTTTATTGCTCGACATTCTTCAGGTACTTAAGG : 2617  
 GAGGTGGAGGTTTCCATTATAGAGAGCGATGTTTTATTAGAGATGAGATGCGTGTACCGAGATGGTTTTATTGCTCGACATTCTTCAGGTACTTAAGG

\* 2700

BniTT8B-b : TGCTCGGTATAGAGACCACTGCGGTTACACCCGTCGTGAACGACCATGATTTTGAGGCAGAGATAAGGGCGAAGGTGAGAGGGAAGAAACCAACCAT : 2716  
 BcaTT8B-b : TGCTCGGTATAGAGACCACTGCGGTTACACCCGTCGTGAACGACCATGATTTTGAGGCAGAGATAAGGGCGAAGGTGAGAGGGAAGAAACCAACCAT : 2716  
 BcaTT8B-y : TGCTCGGTATAGAGACCACTGCGGTTACACCCGTCGTGAACGACCATGATTTTGAGGCAGAGATAAGGGCGAAGGTGAGAGGGAAGAAACCAACCAT : 2716  
 BjuTT8B-d : TGCTCGGTATAGAGACCACTGCGGTTACACCCGTCGTGAACGACCATGATTTTGAGGCAGAGATAAGGGCGAAGGTGAGAGGGAAGAAACCAACCAT : 2714  
 BjuTT8B-y : TGCTCGGTATAGAGACCACTGCGGTTACACCCGTCGTGAACGACCATGATTTTGAGGCAGAGATAAGGGCGAAGGTGAGAGGGAAGAAACCAACCAT : 2714  
 TGCTCGGTATAGAGACCACTGCGGTTACACCCGTCGTGAACGACCATGATTTTGAGGCAGAGATAAGGGCGAAGGTGAGAGGGAAGAAACCAACCAT

\* 2766

BniTT8B-b : TGCTGAGGTTAAAAATAGCCATCCATCAAATCATATCTCAAAATAAACTCTAG : 2768  
 BcaTT8B-b : TGCTGAGGTTAAAAATAGCCATCCATCAAATCATATCTCAAAATAAACTCTAG : 2768  
 BcaTT8B-y : TGCTGAGGTTAAAAATAGCCATCCATCAAATCATATCTCAAAATAAACTCTAG : 2768  
 BjuTT8B-d : TGCTGAGGTTAAAAATAGCCATCCATCAAATCATATCTCAAAATAAACTCTAG : 2766  
 BjuTT8B-y : TGCTGAGGTTAAAAATAGCCATCCATCAAATCATATCTCAAAATAAACTCTAG : 2766  
 TGCTGAGGTTAAAAATAGCCATCCATCAAATCATATCTCAAAATAAACTCTAG
